# Supplementary material
Source: publisher figshare collection journal article supplement (https://frontiersin.figshare.com/ndownloader/files/17620076)
Supplement: Supplementary file [file 17620076]

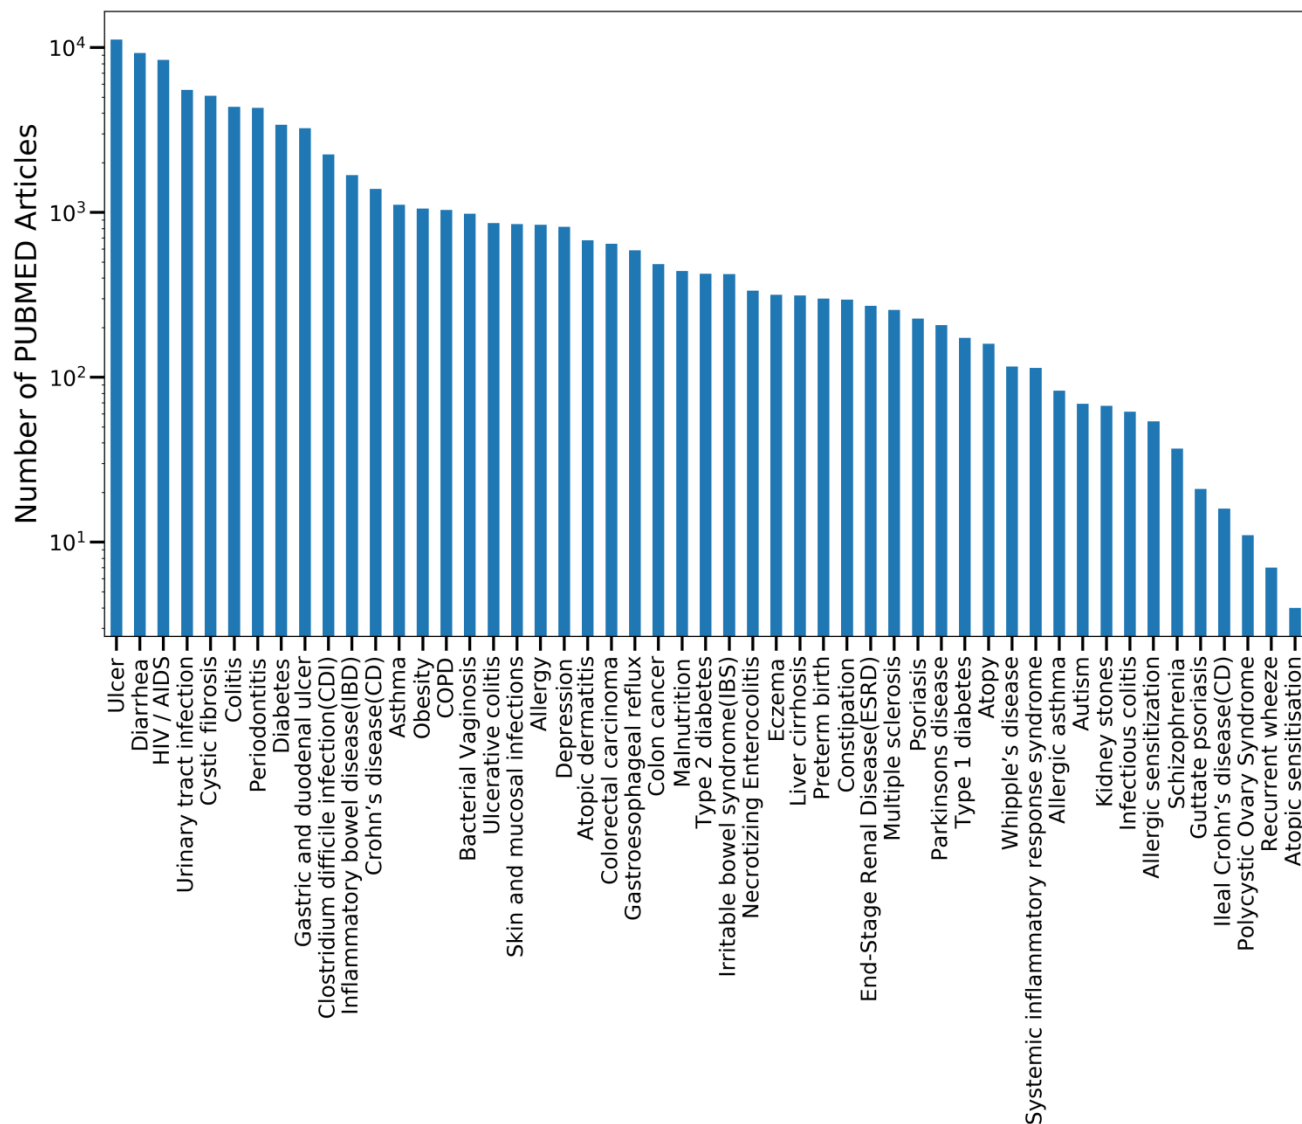

**Supplementary Figure 1:** Bar plot showing the number of PubMed articles (y axis) which report a disease (x axis). The y axis is shown as a log scale

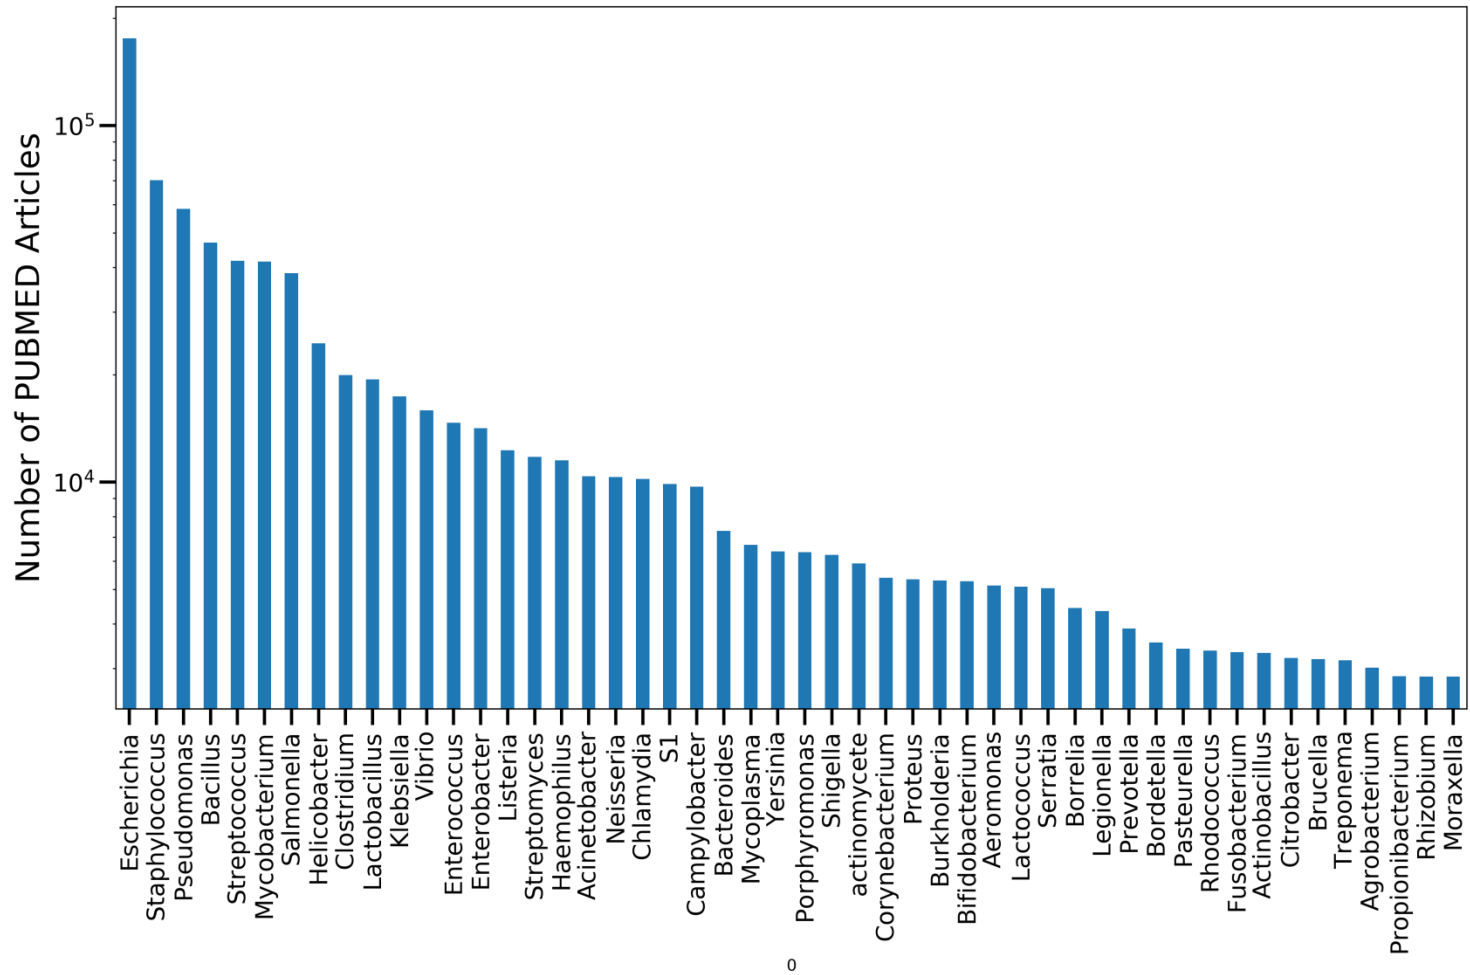

**Supplementary Figure 2:** Bar plot showing the number of PubMed articles (y axis) which report a taxa (x axis). The top 50 genera are shown on the x axis. The y axis is shown in log scale

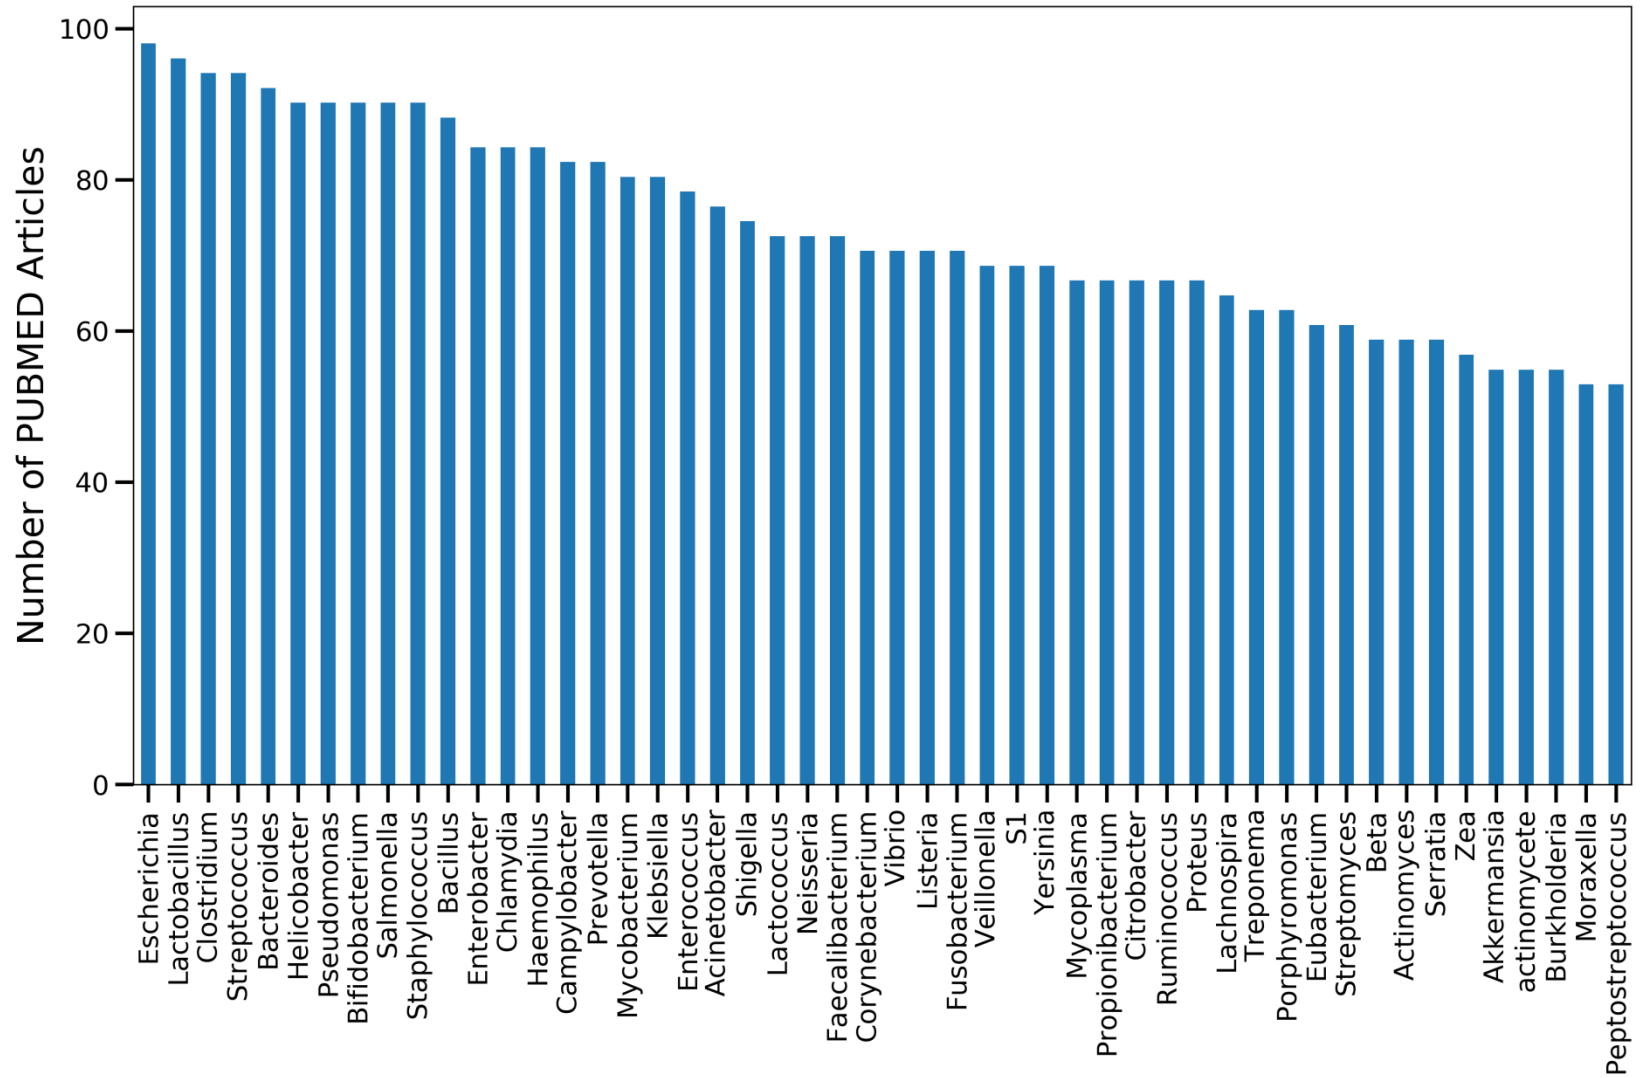

**Supplementary Figure 3:** Bar plot showing the percentage of diseases (y axis) which are reported to be linked to a taxa (x axis). The top 50 genera are shown on the x axis.

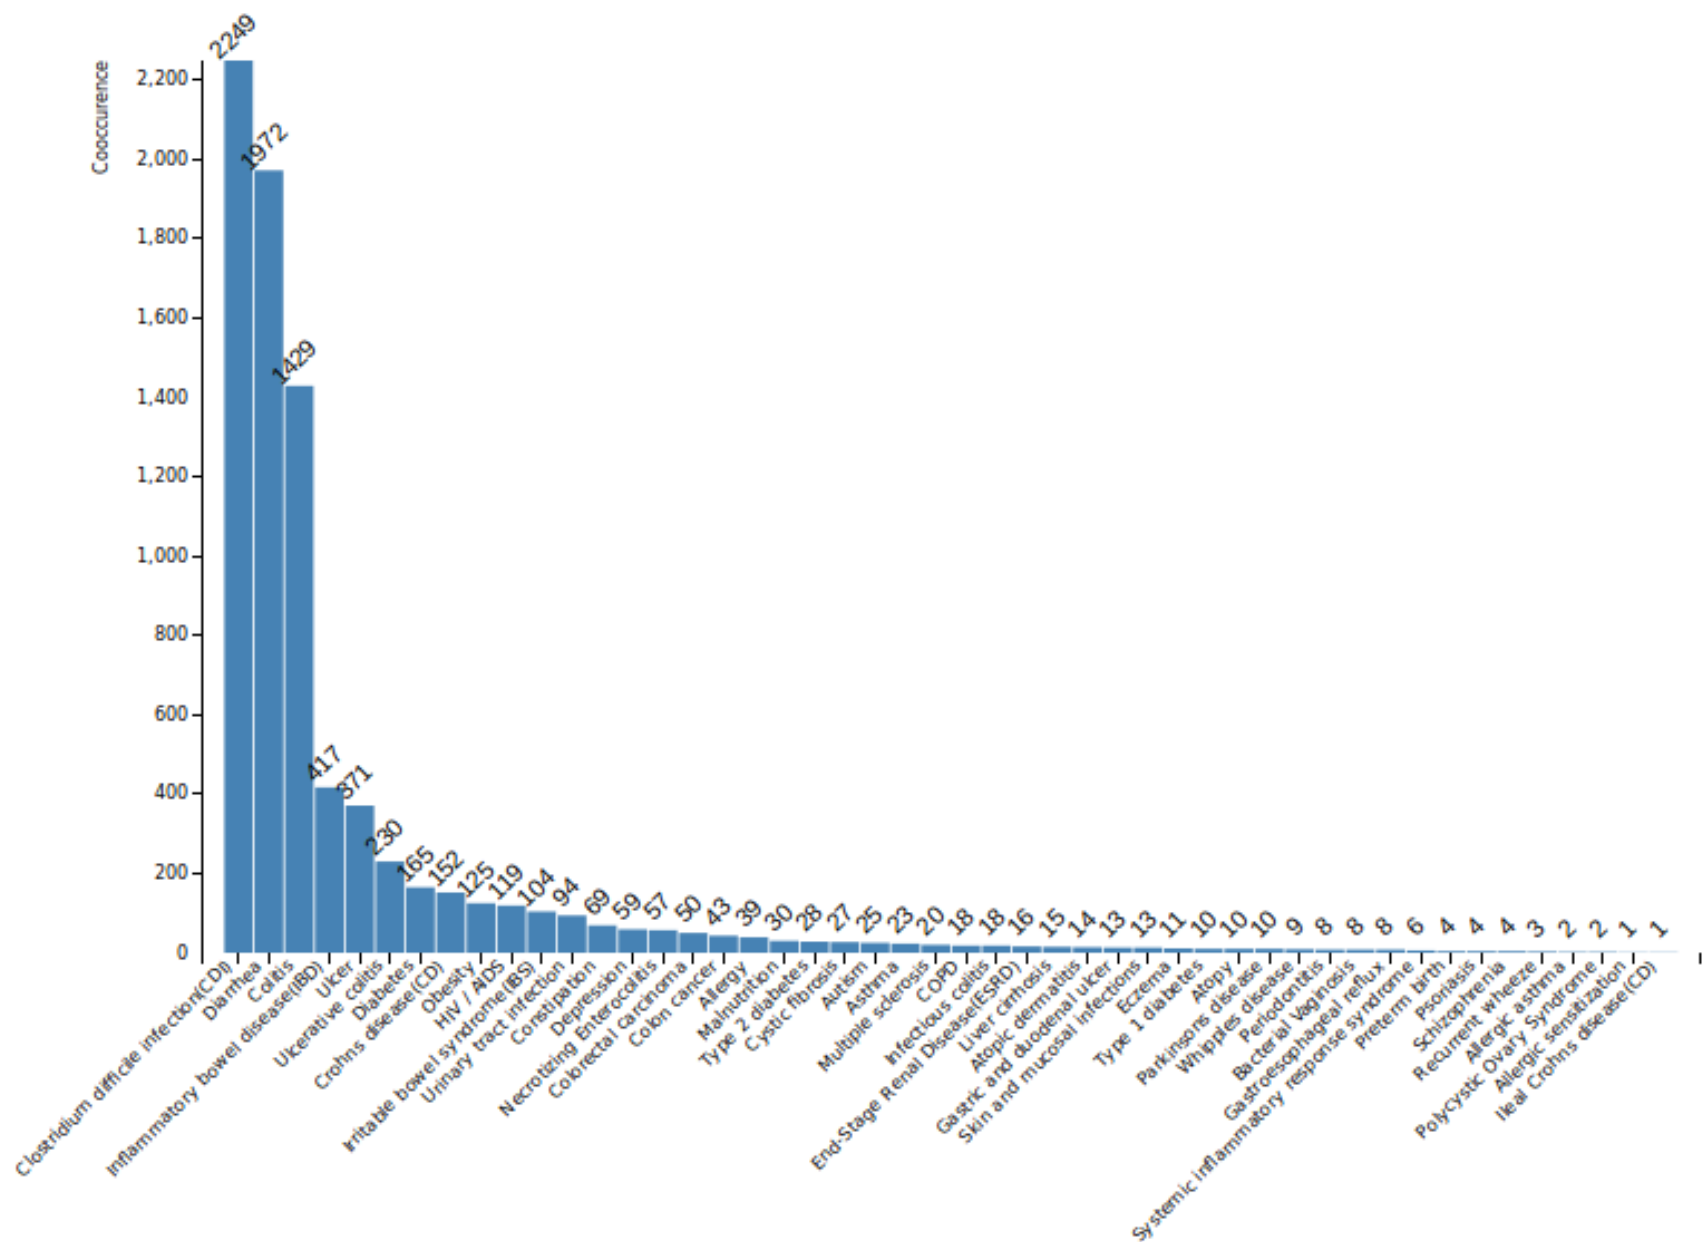

**Supplementary Figure 4:** Visualizing associated diseases for genera *Clostridium*

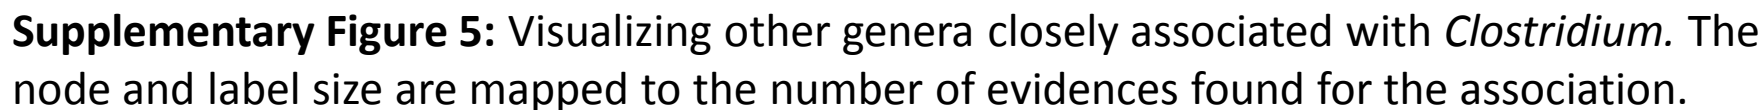

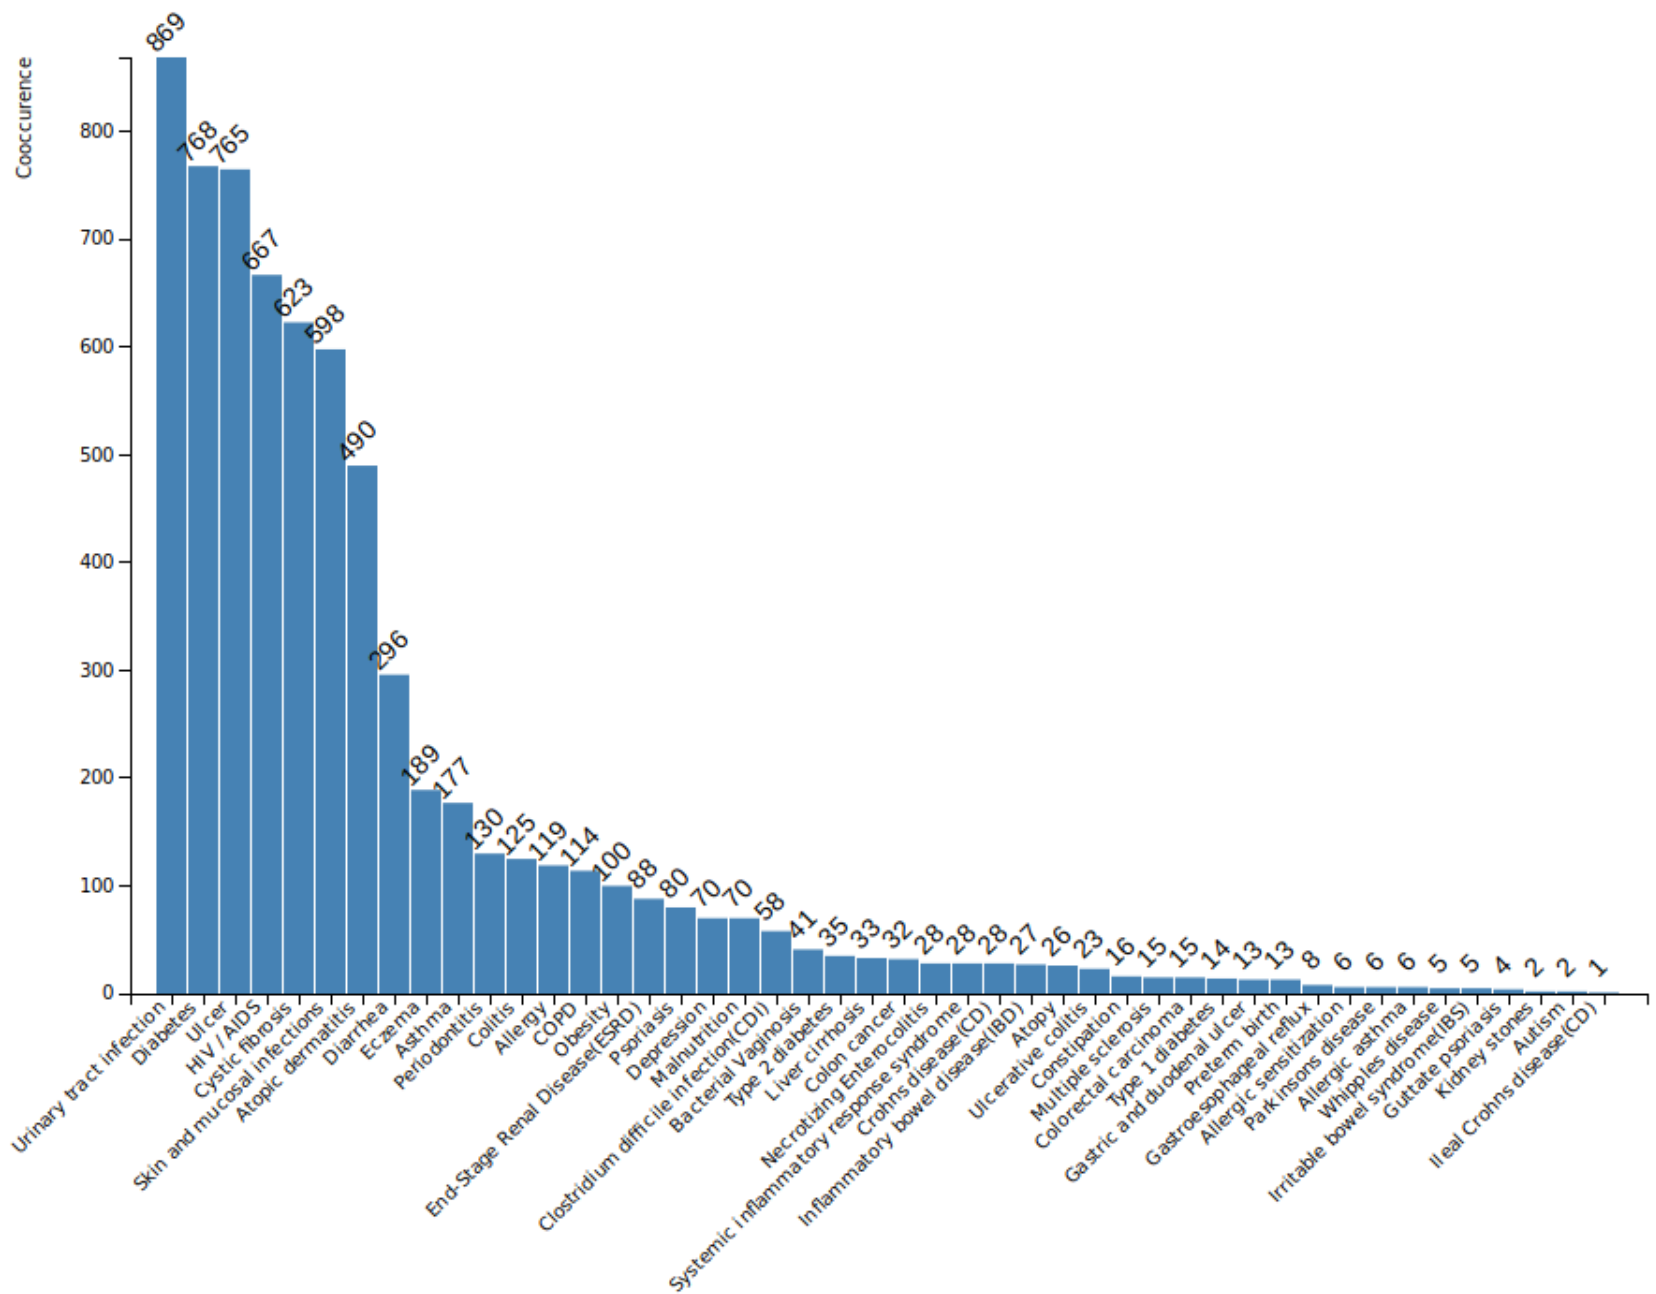

**Supplementary Figure 6:** Visualizing associated diseases for genera *Staphylococcus*

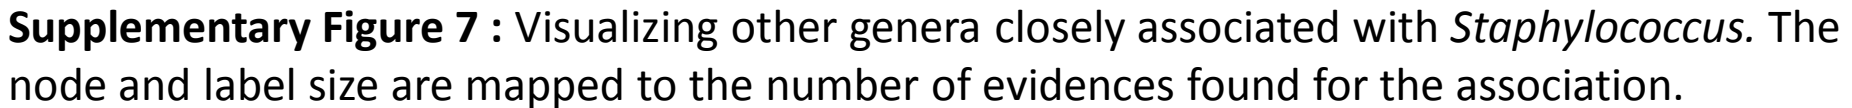

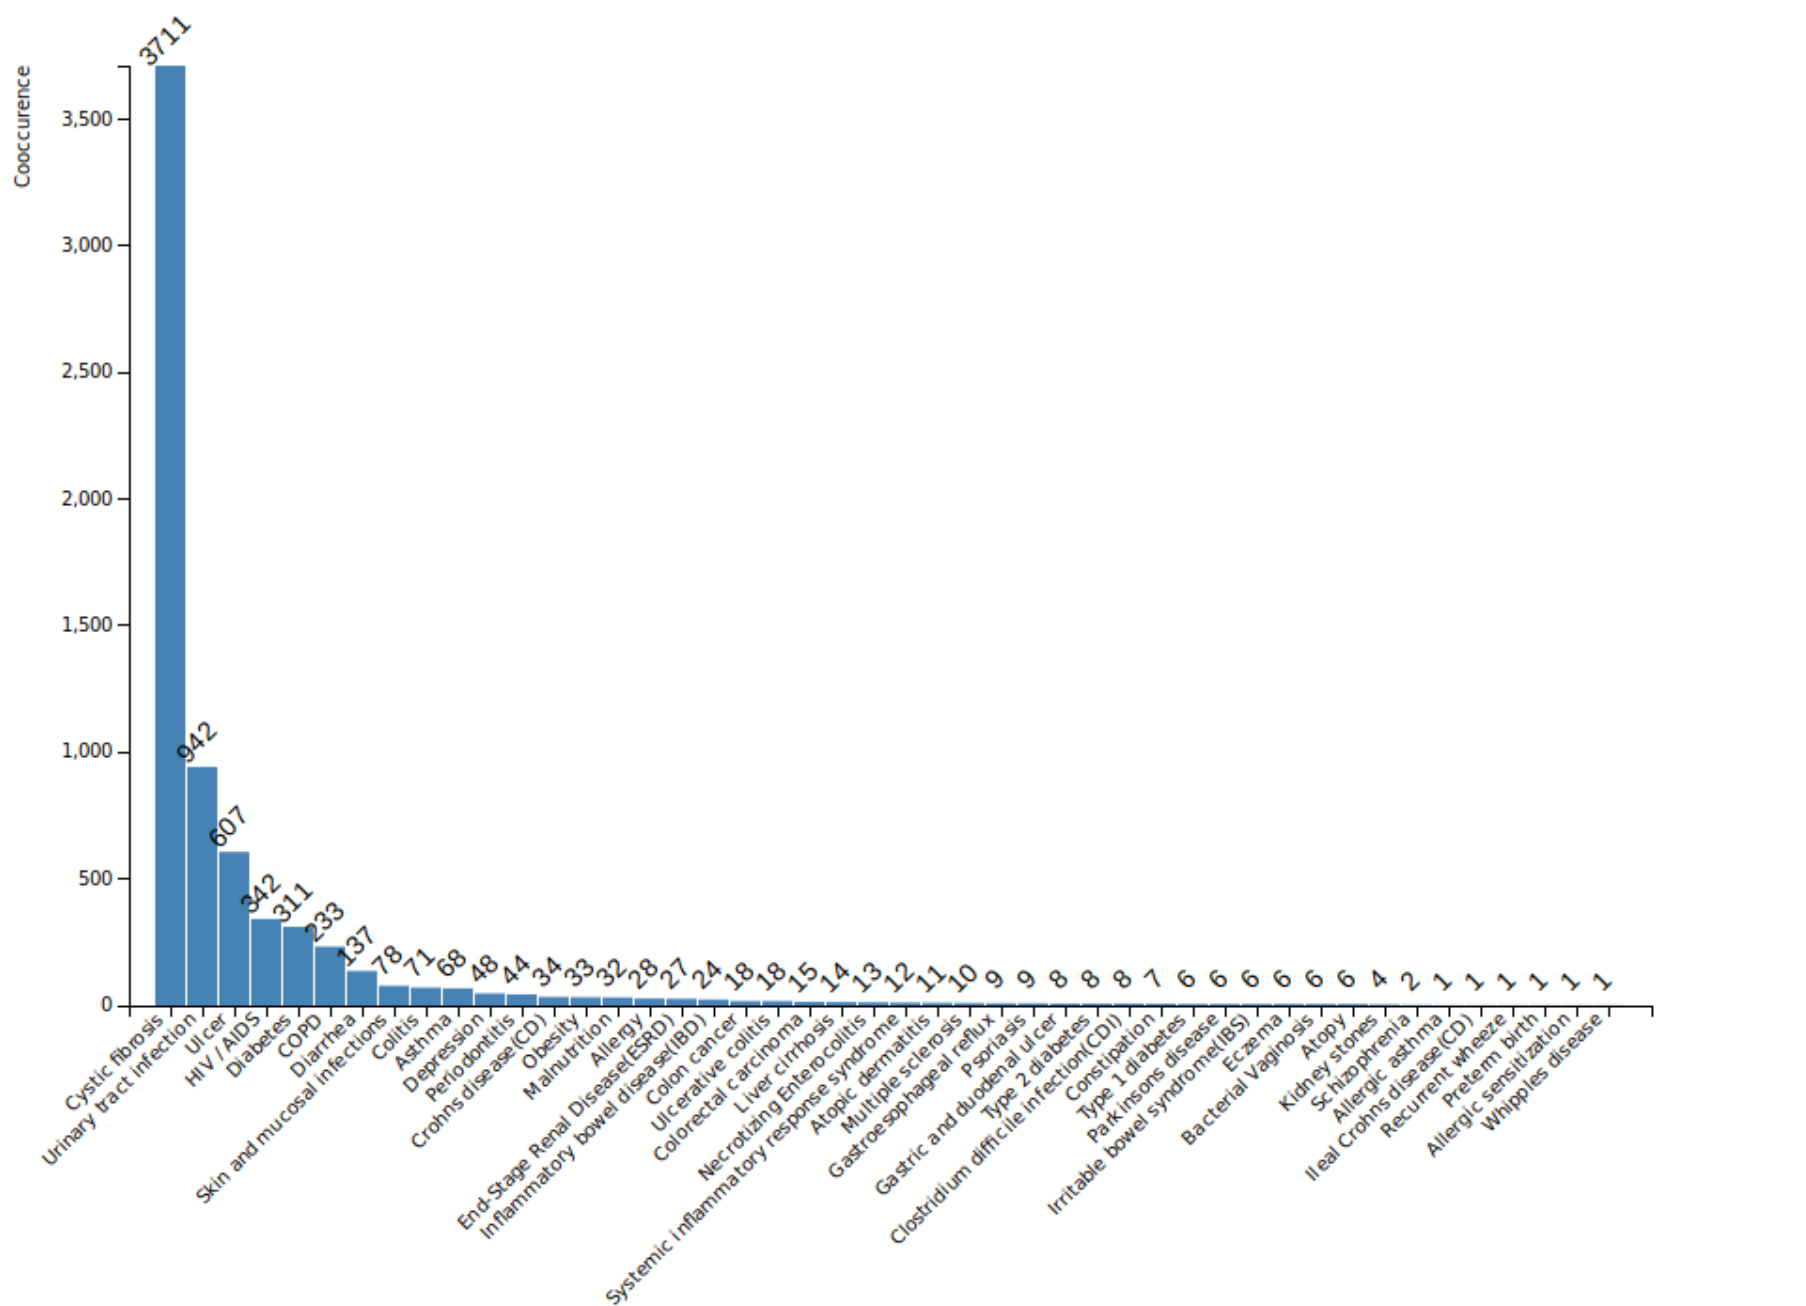

**Supplementary Figure 8 :** Visualizing associated diseases for genera *Pseudomonas*



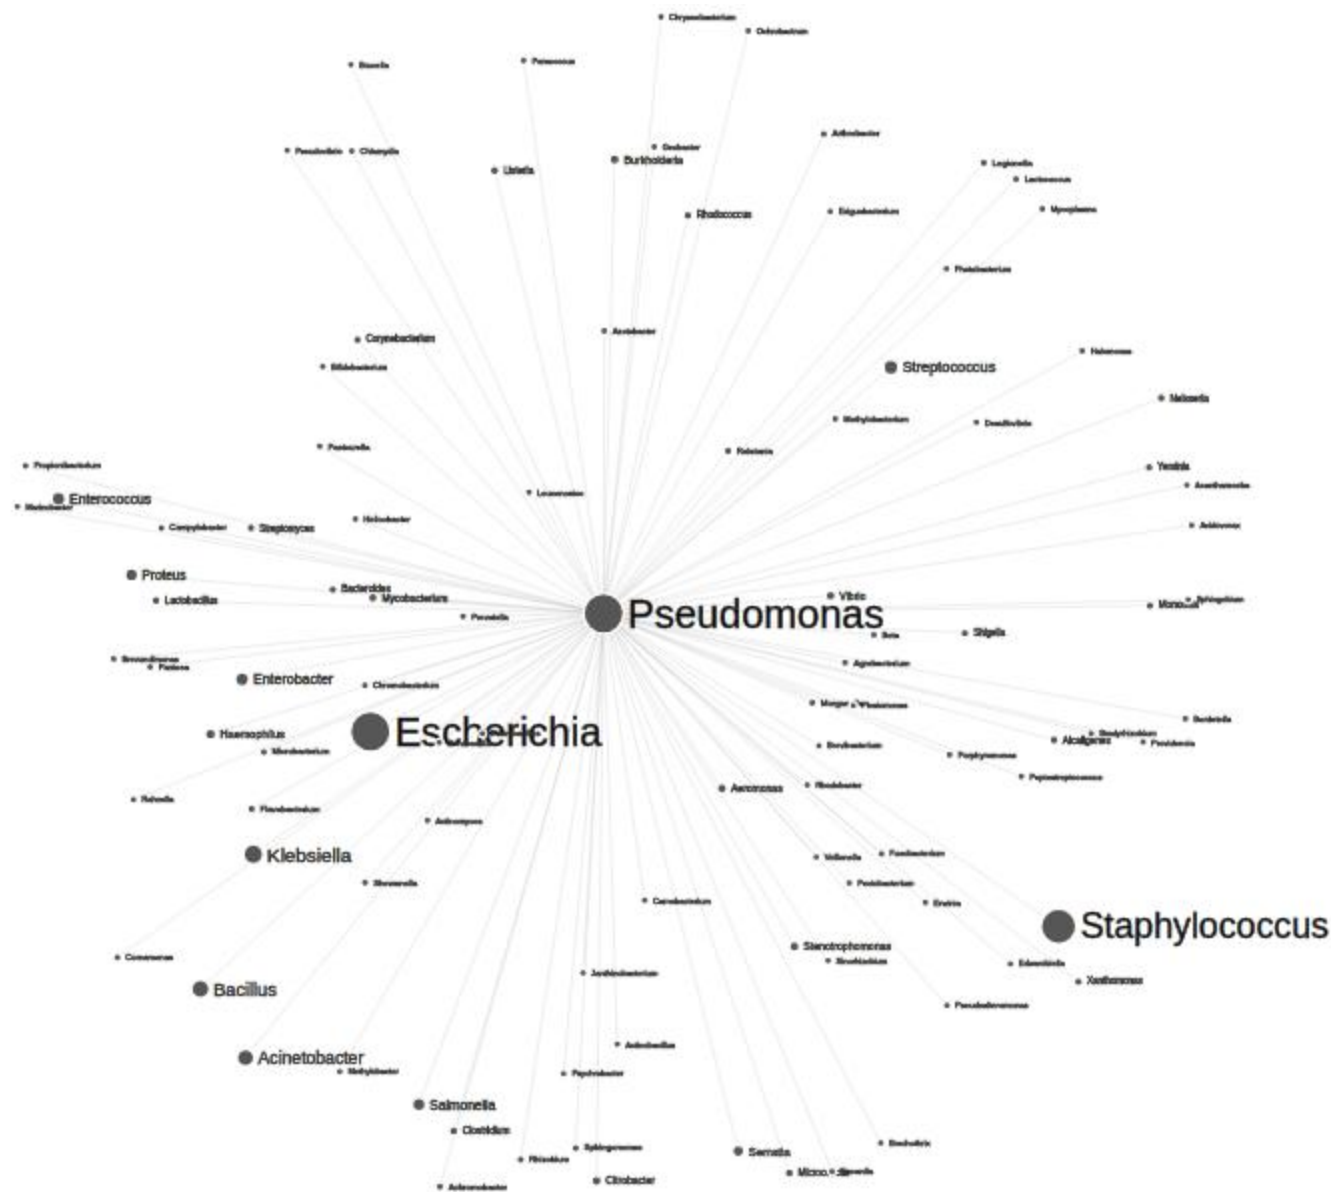

**Supplementary Figure 9 :** Visualizing other genera closely associated with *Pseudomonas*. The node and label size are mapped to the number of evidences found for the association.

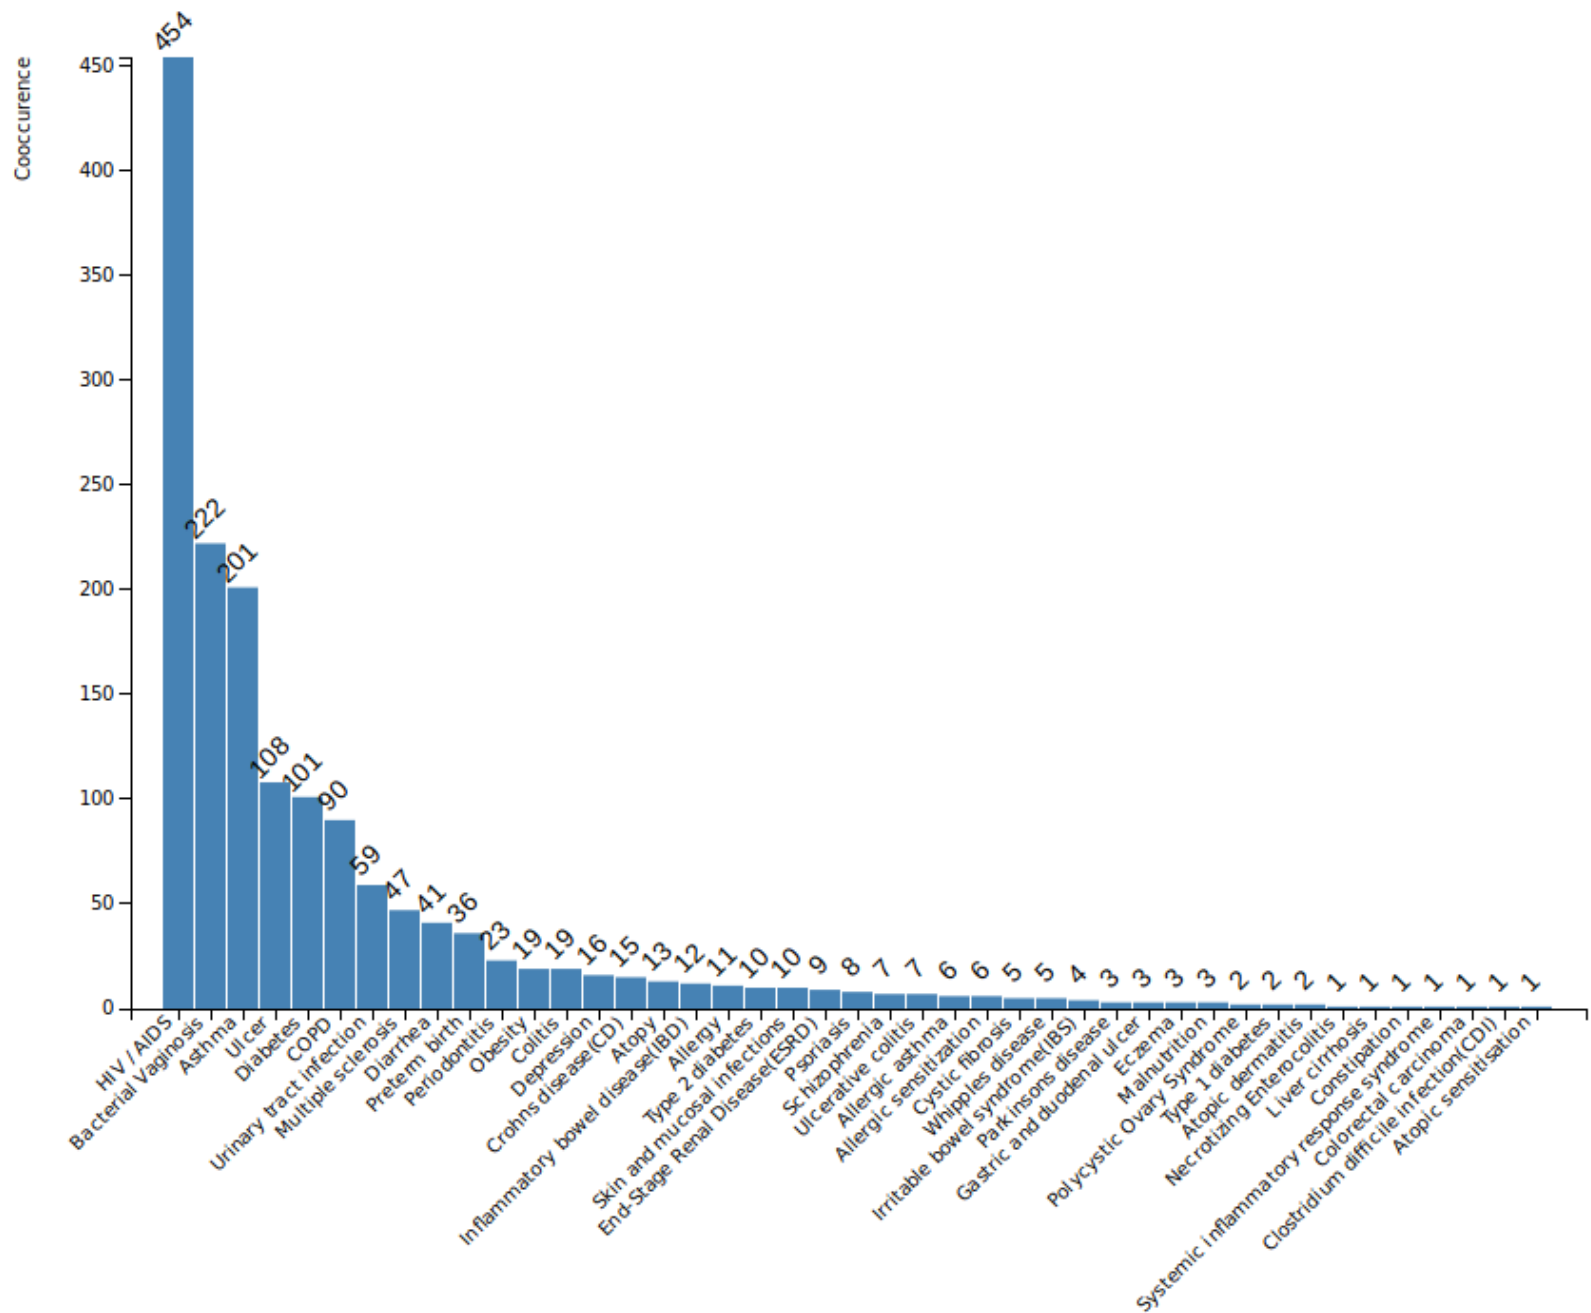

**Supplementary Figure 10 :** Visualizing associated diseases for genera *Chlamydia*

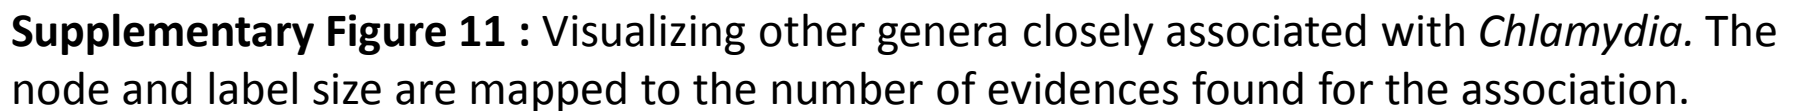

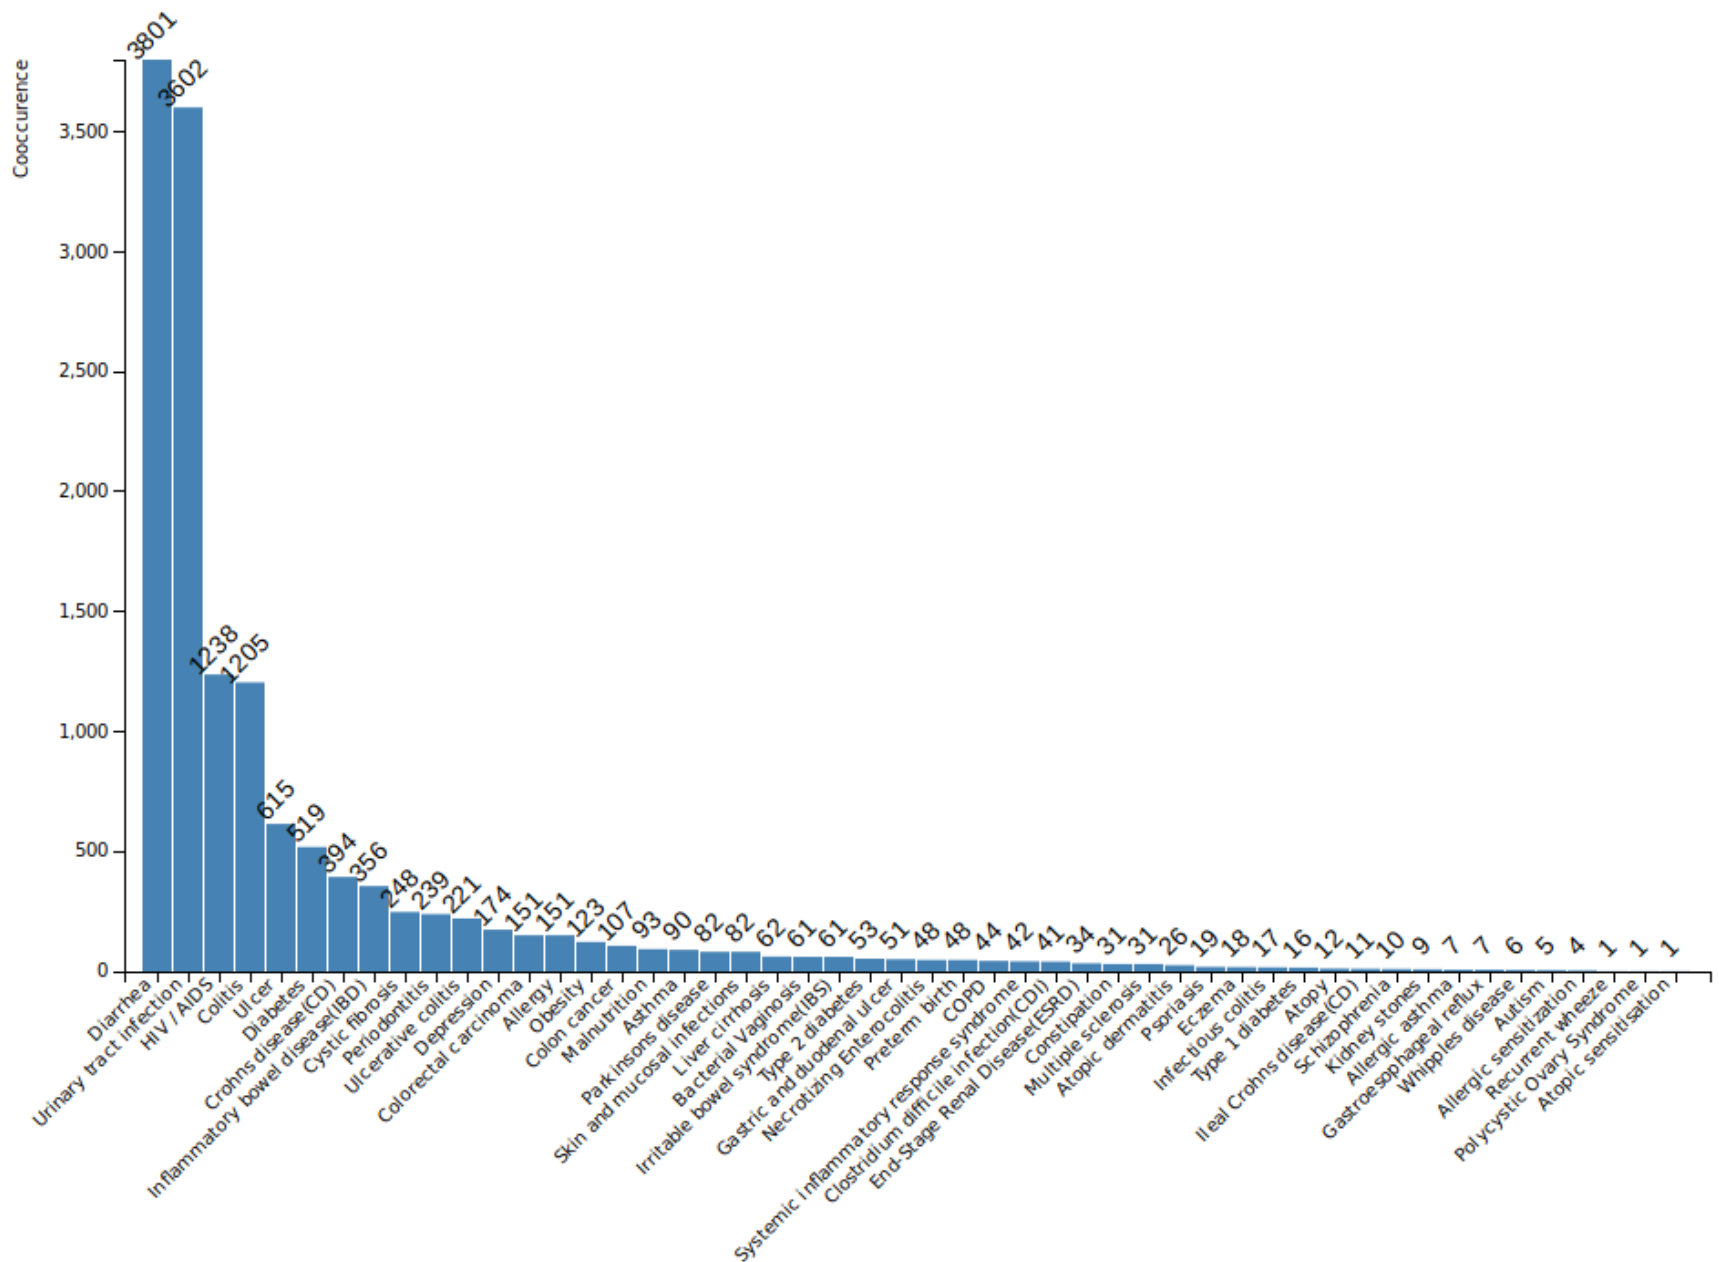

**Supplementary Figure 12 :** Visualizing associated diseases for genera *Escherichia*



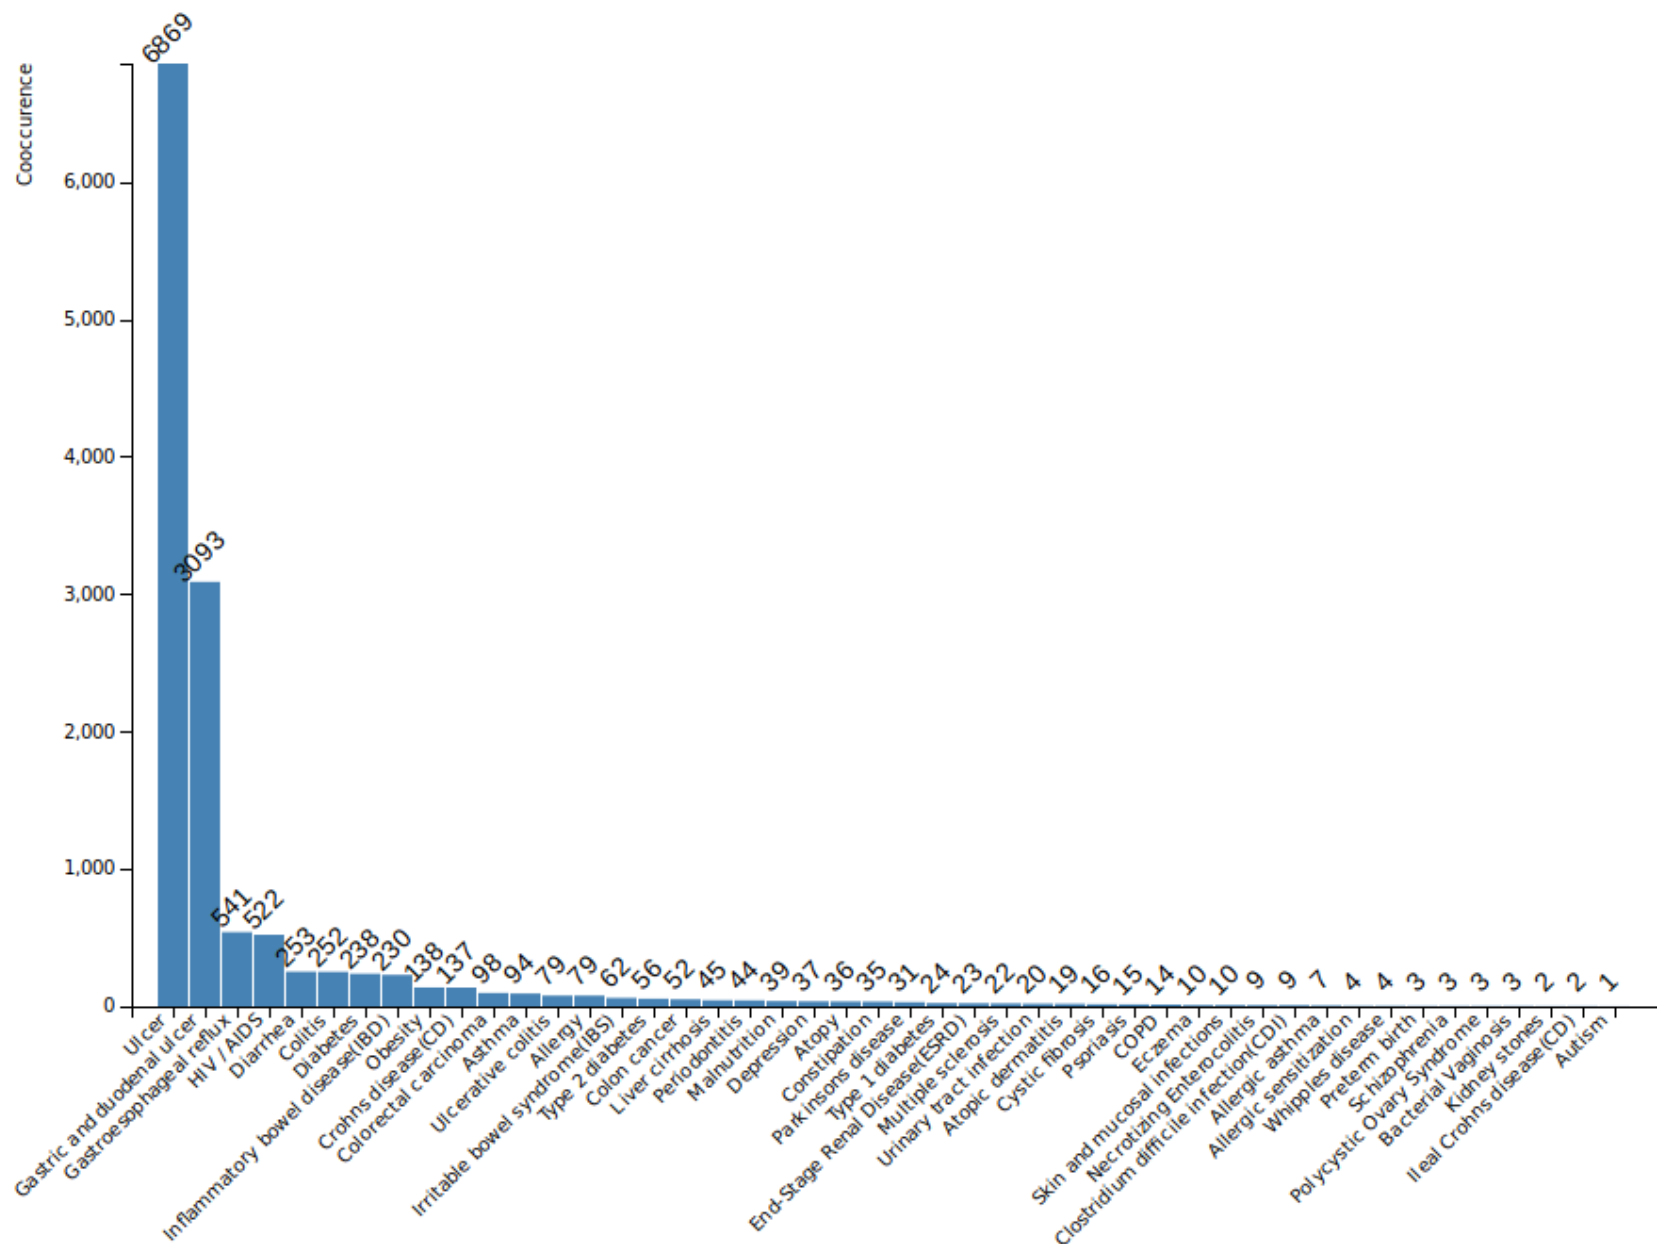

**Supplementary Figure 14 :** Visualizing associated diseases for genera *Helicobacter*

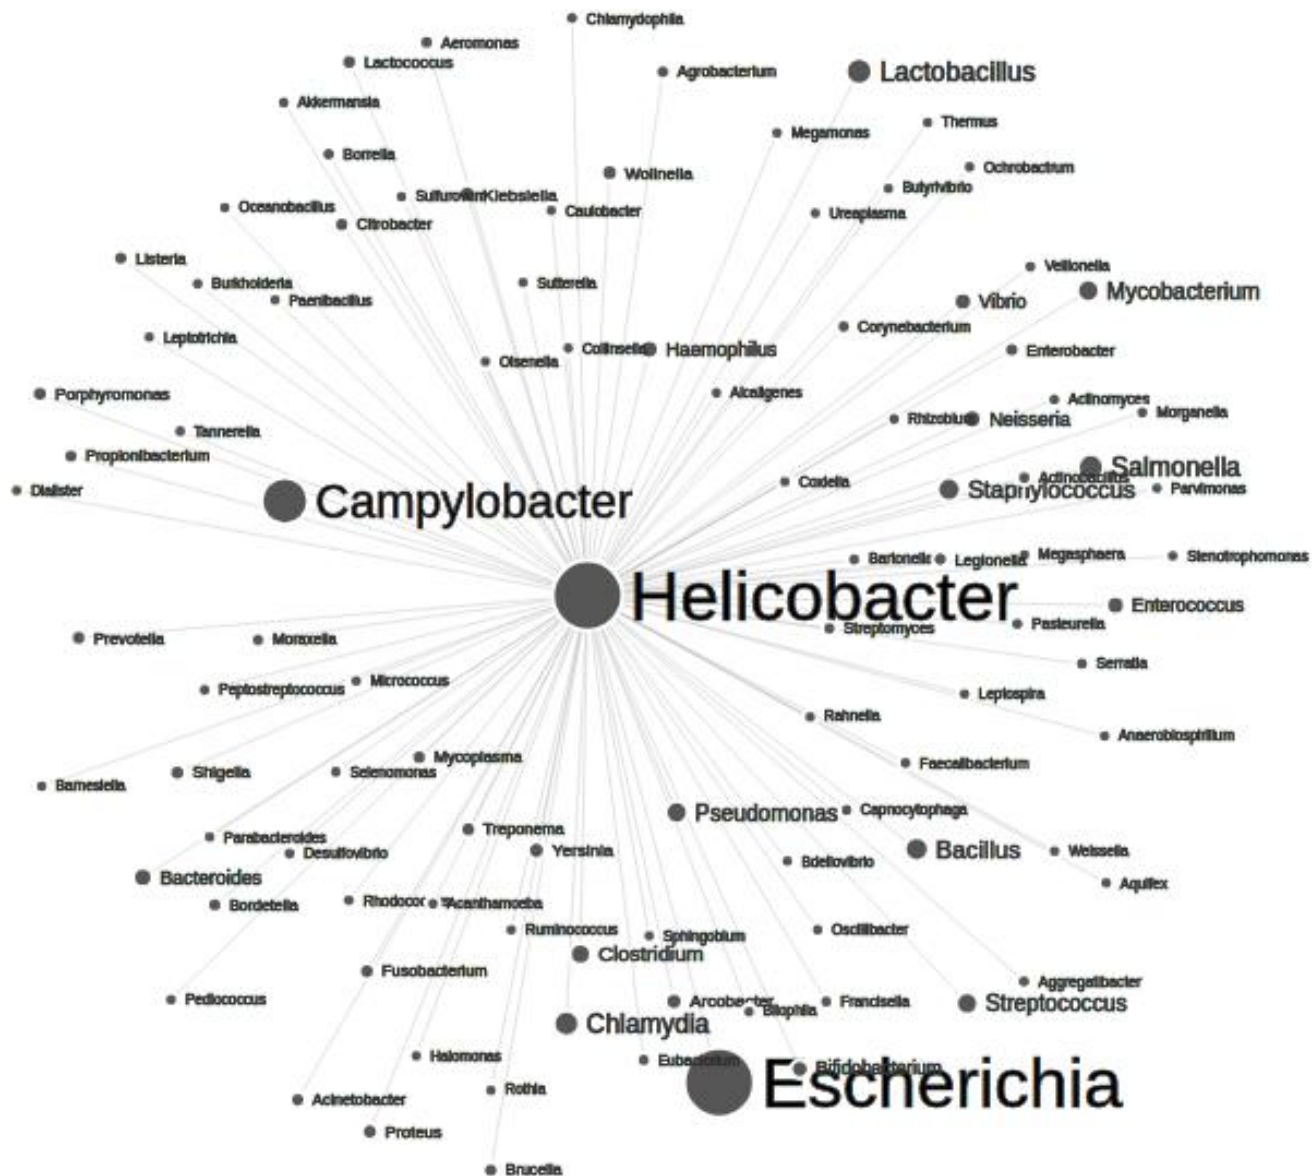

**Supplementary Figure 15 :** Visualizing other genera closely associated with *Helicobacter*. The node and label size are mapped to the number of evidences found for the association.



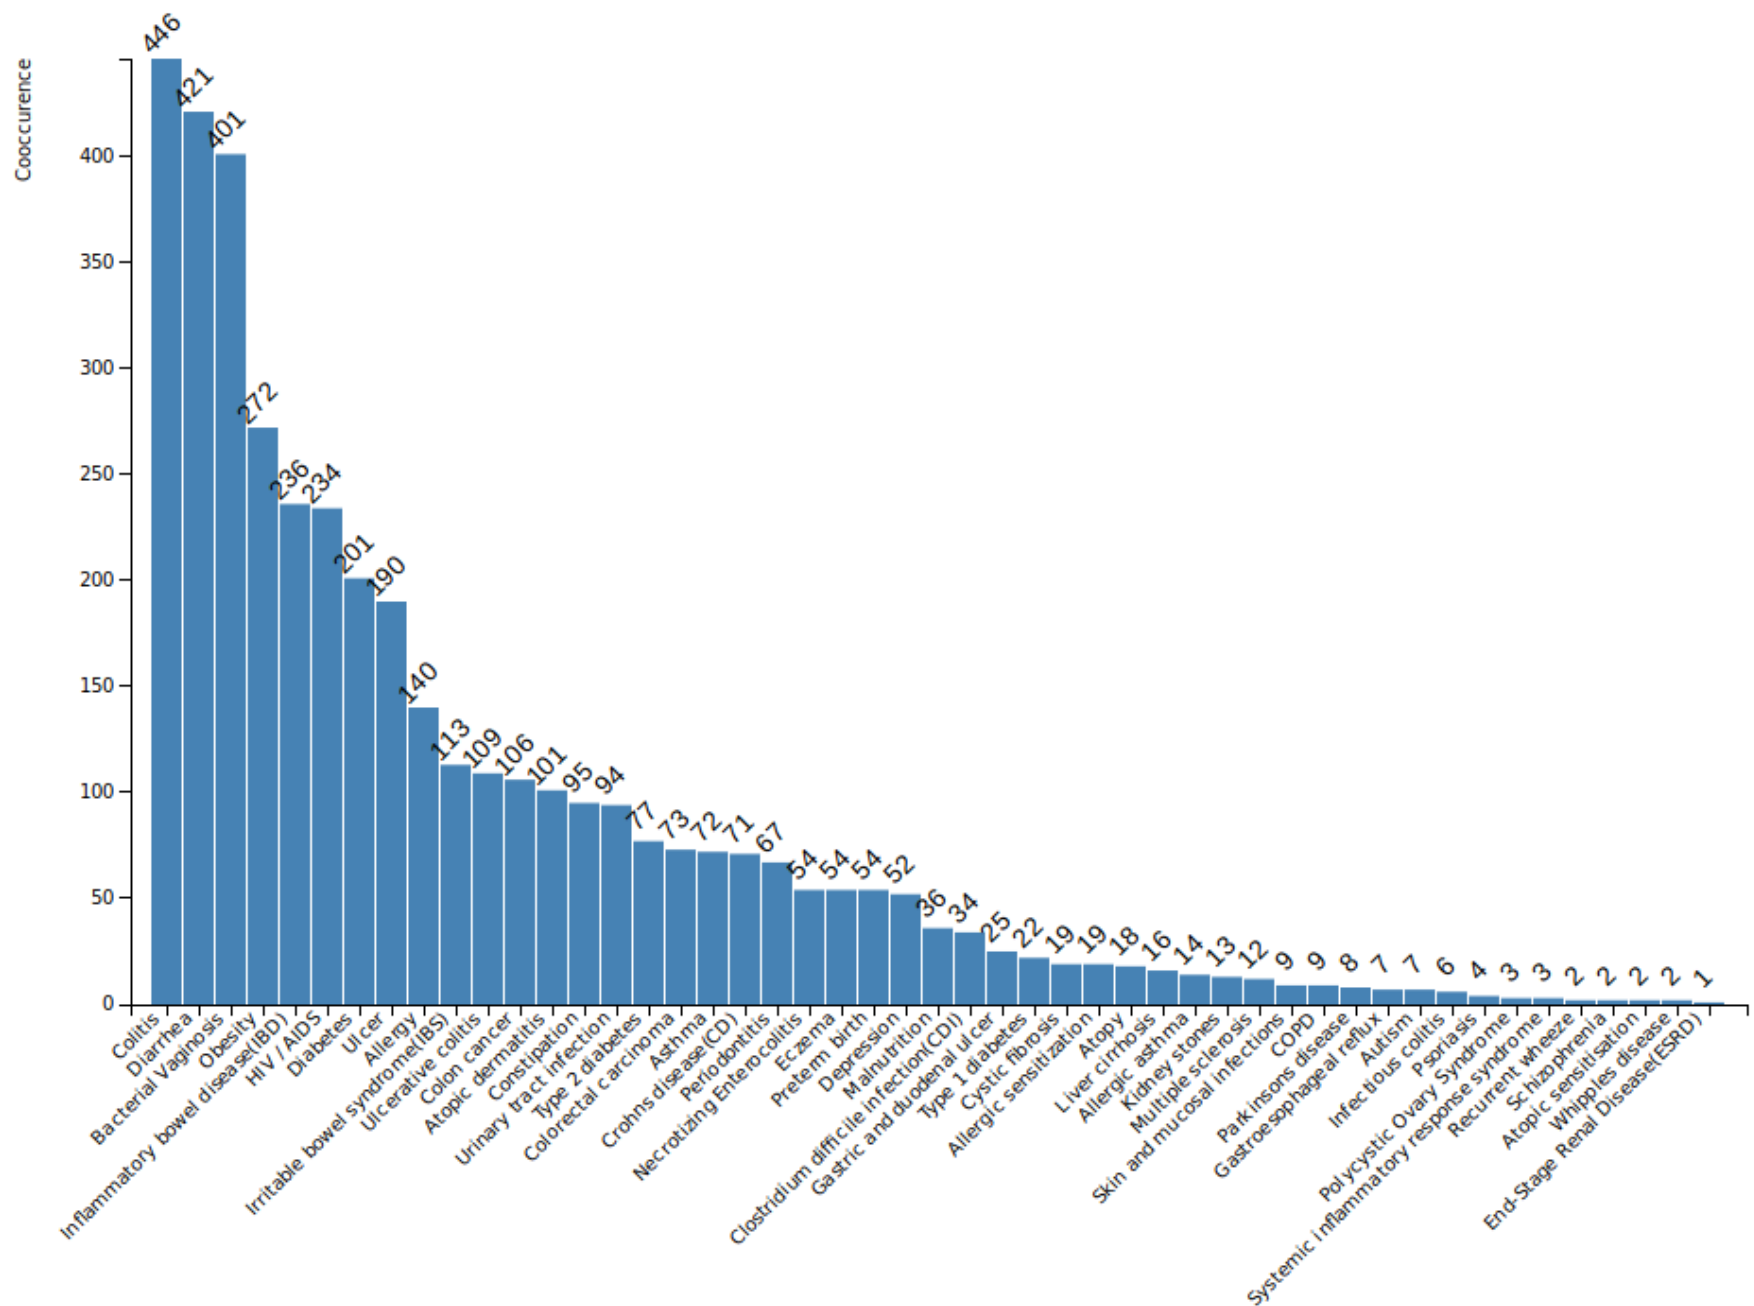

**Supplementary Figure 16 :** Visualizing associated diseases for genera *Lactobacillus*





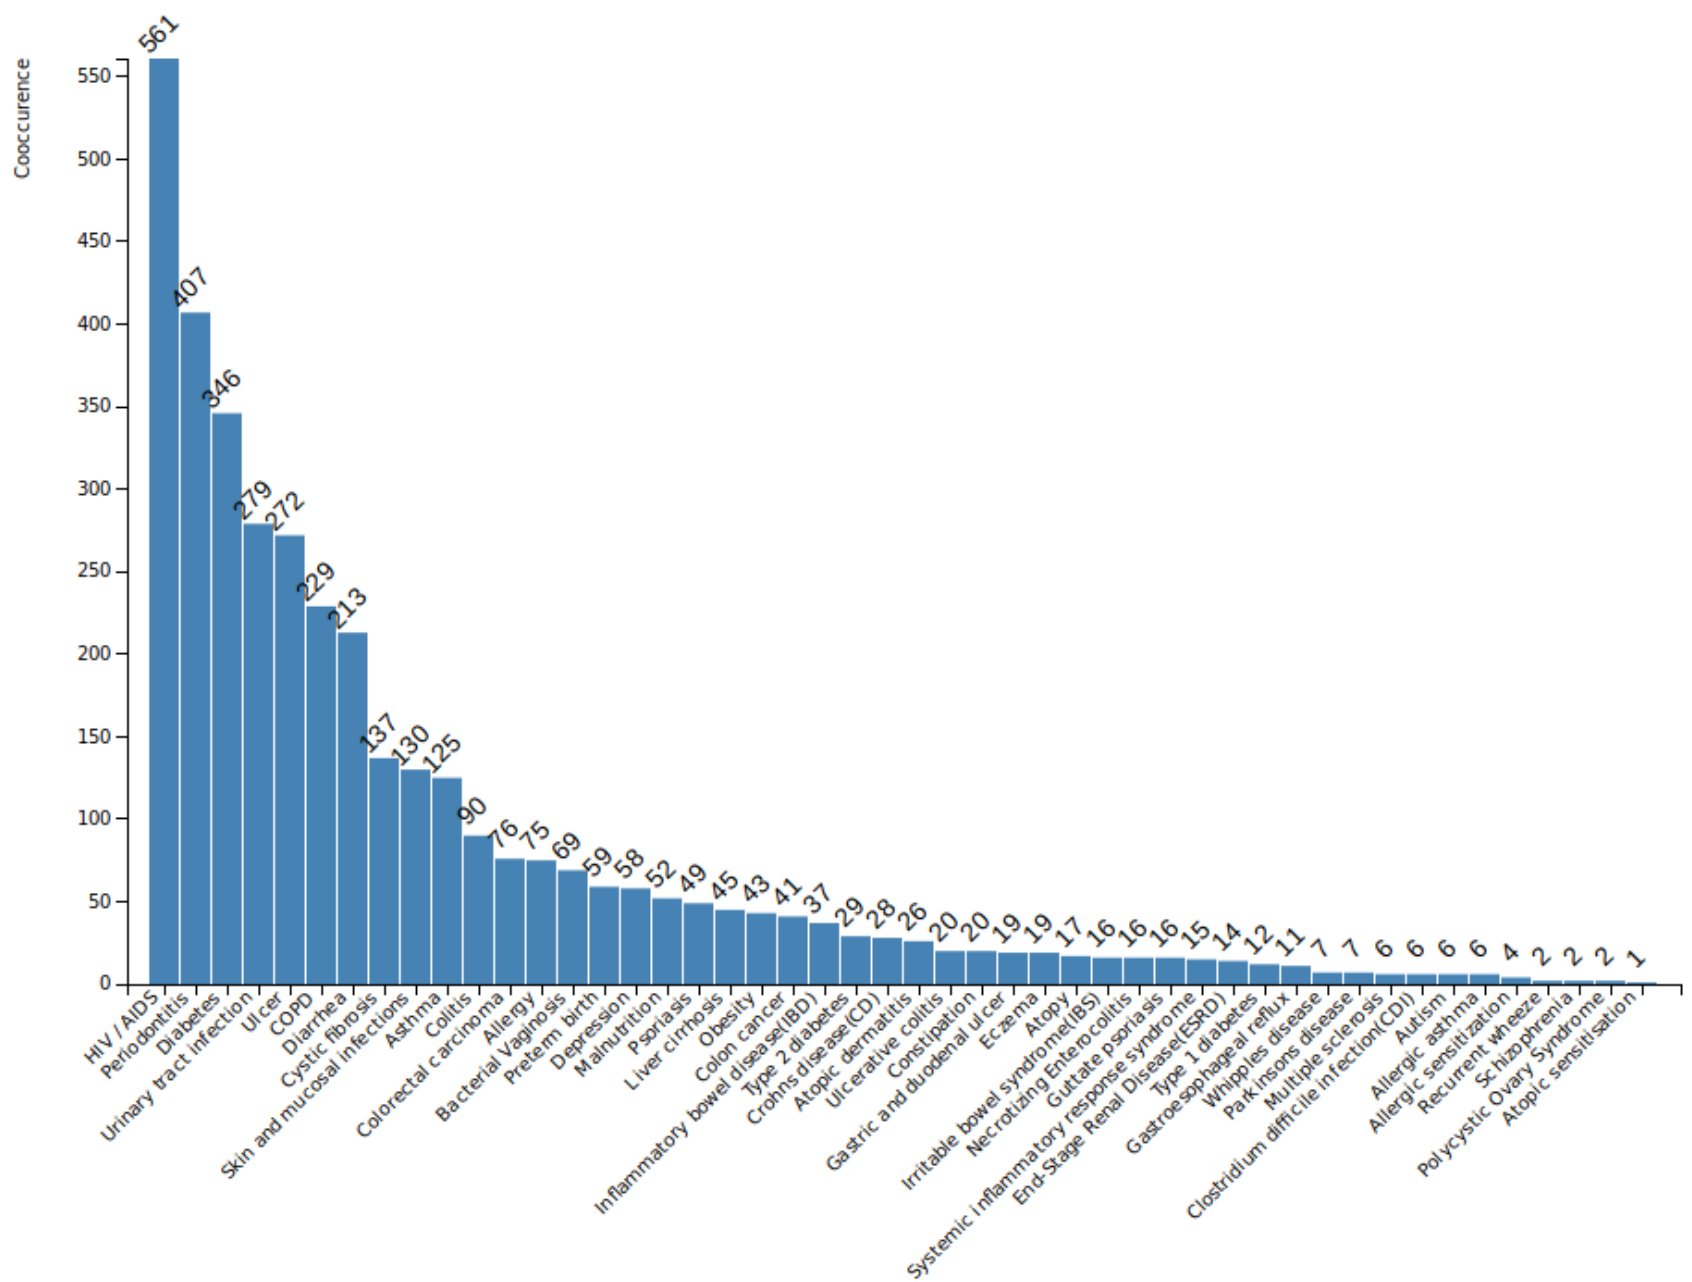

**Supplementary Figure 18 :** Visualizing associated diseases for genera *Streptococcus*



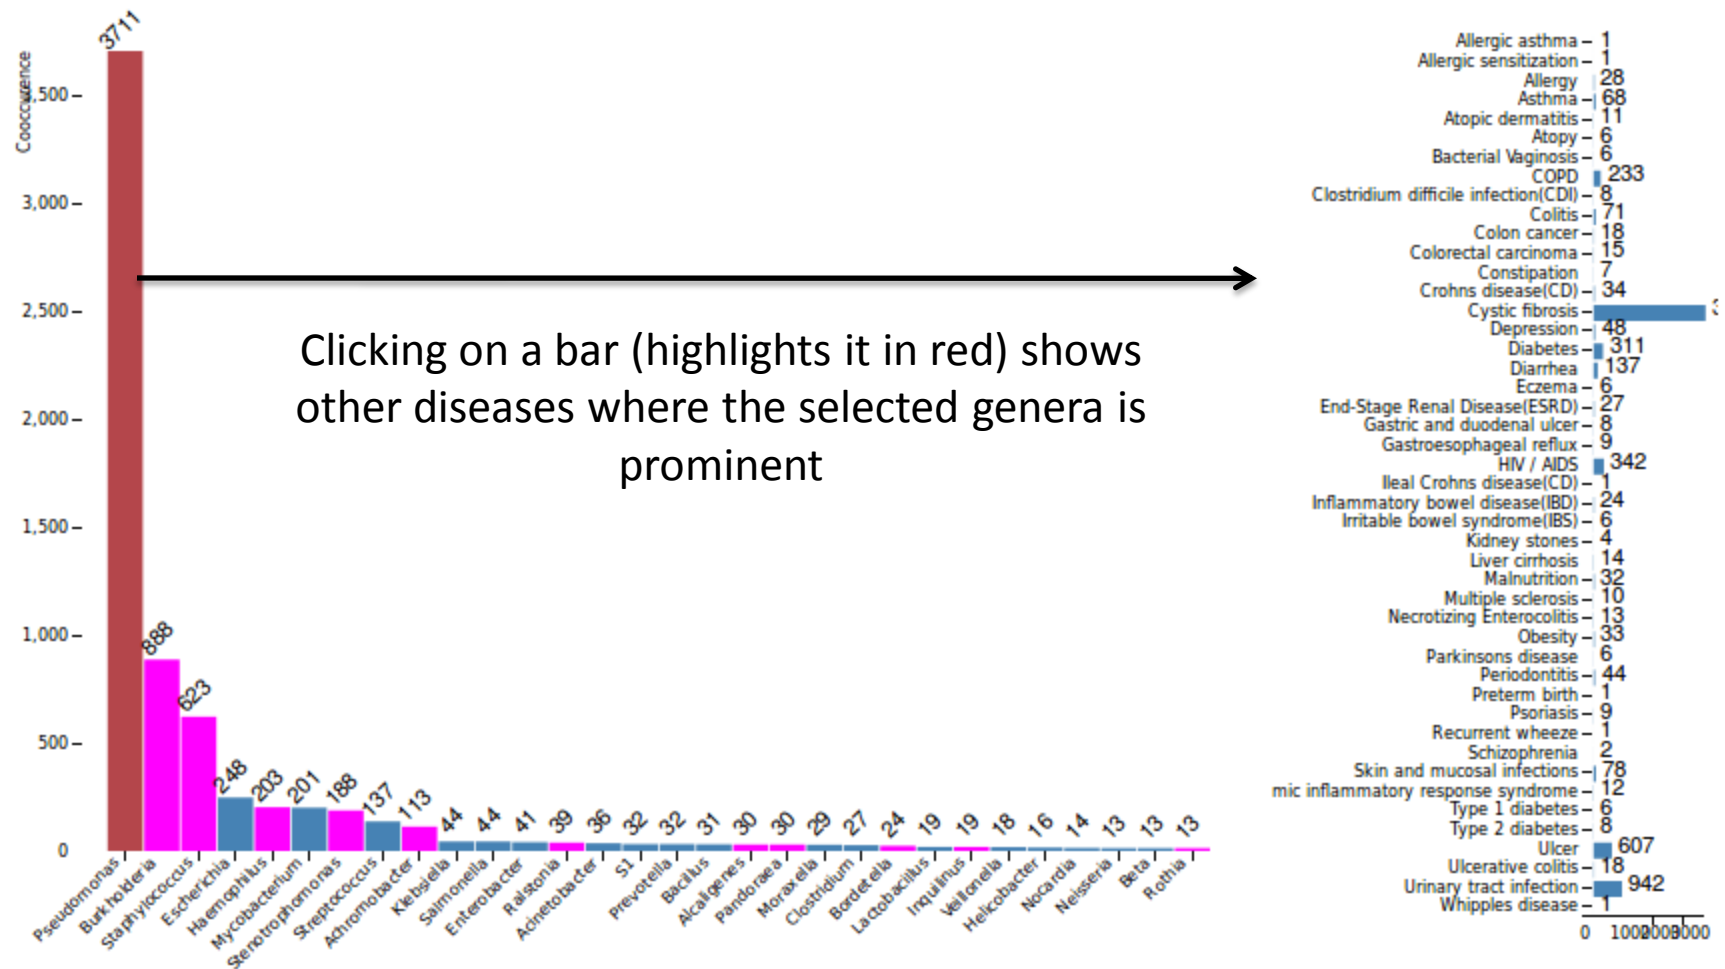

N.B: Pink bars represent the taxa identified to be associated significantly with the disease

**Supplementary Figure 20** : Visualizing top genera associated with disease Cystic Fibrosis

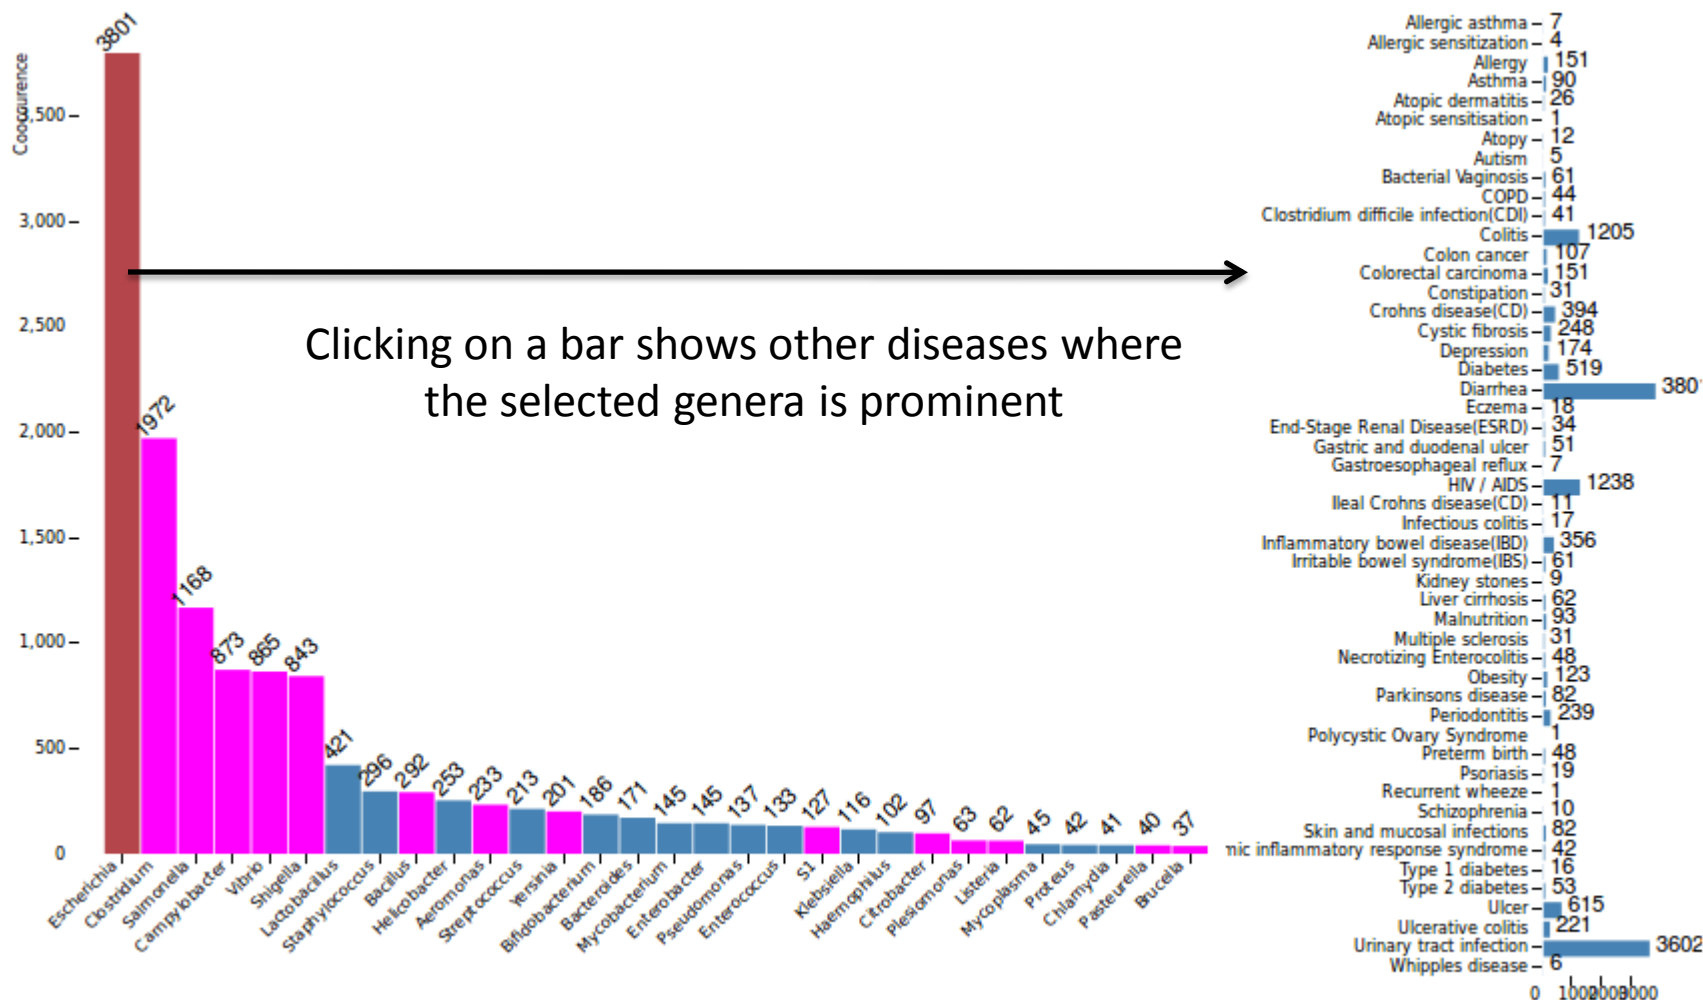

N.B: Pink bars represent the taxa identified to be associated significantly with the disease

**Supplementary Figure 21** : Visualizing top genera associated with disease Diarrhea

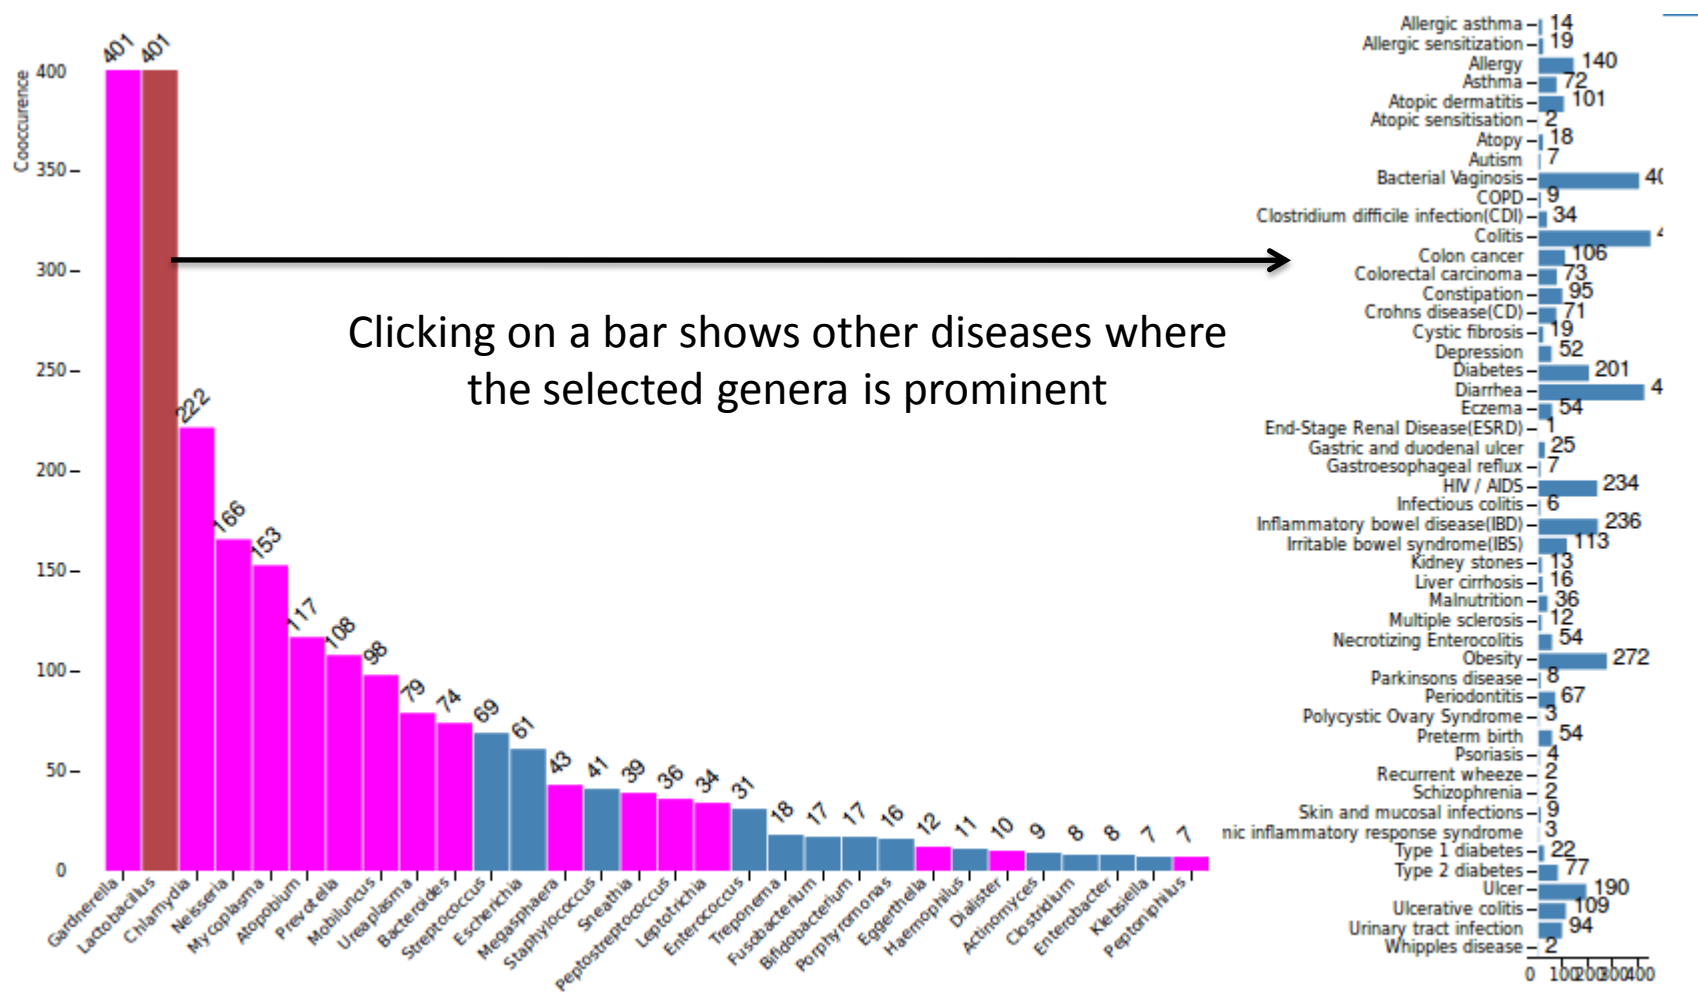

N.B: Pink bars represent the taxa identified to be associated significantly with the disease

**Supplementary Figure 22 :** Visualizing top genera associated with disease Bacterial vaginosis

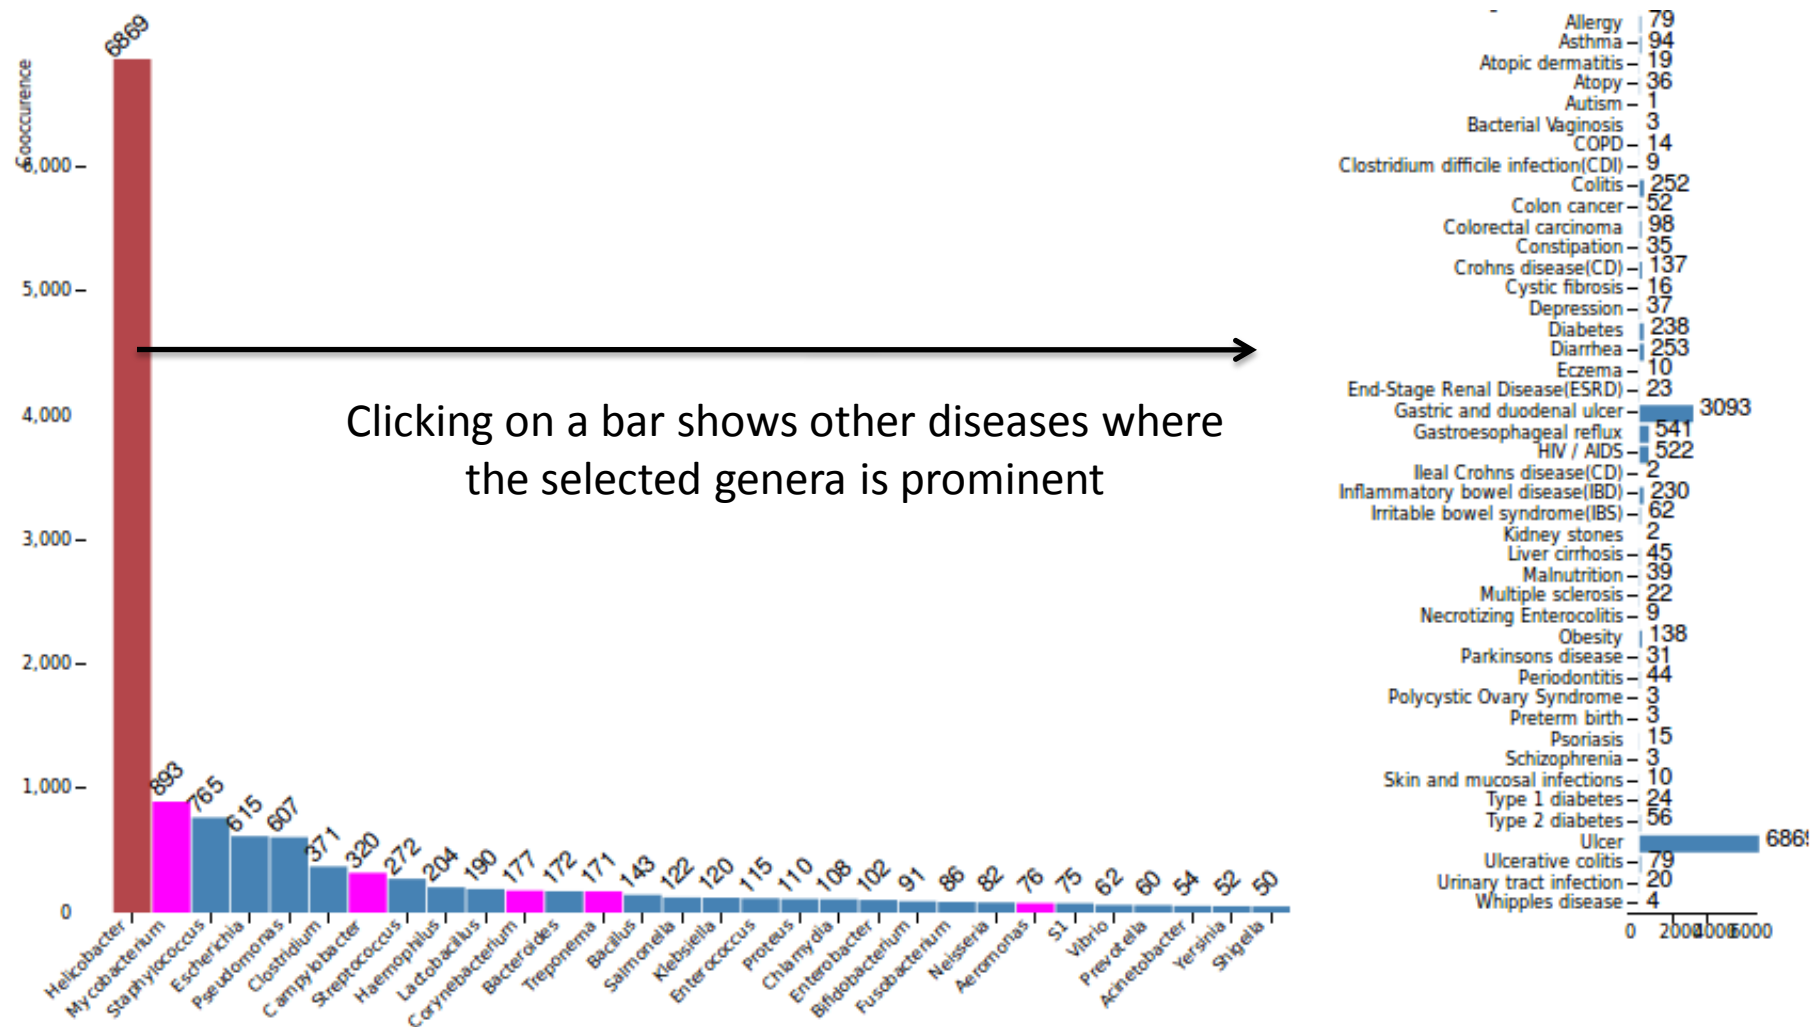

N.B: Pink bars represent the taxa identified to be associated significantly with the disease

**Supplementary Figure 23** :Visualizing top genera associated with disease Ulcer



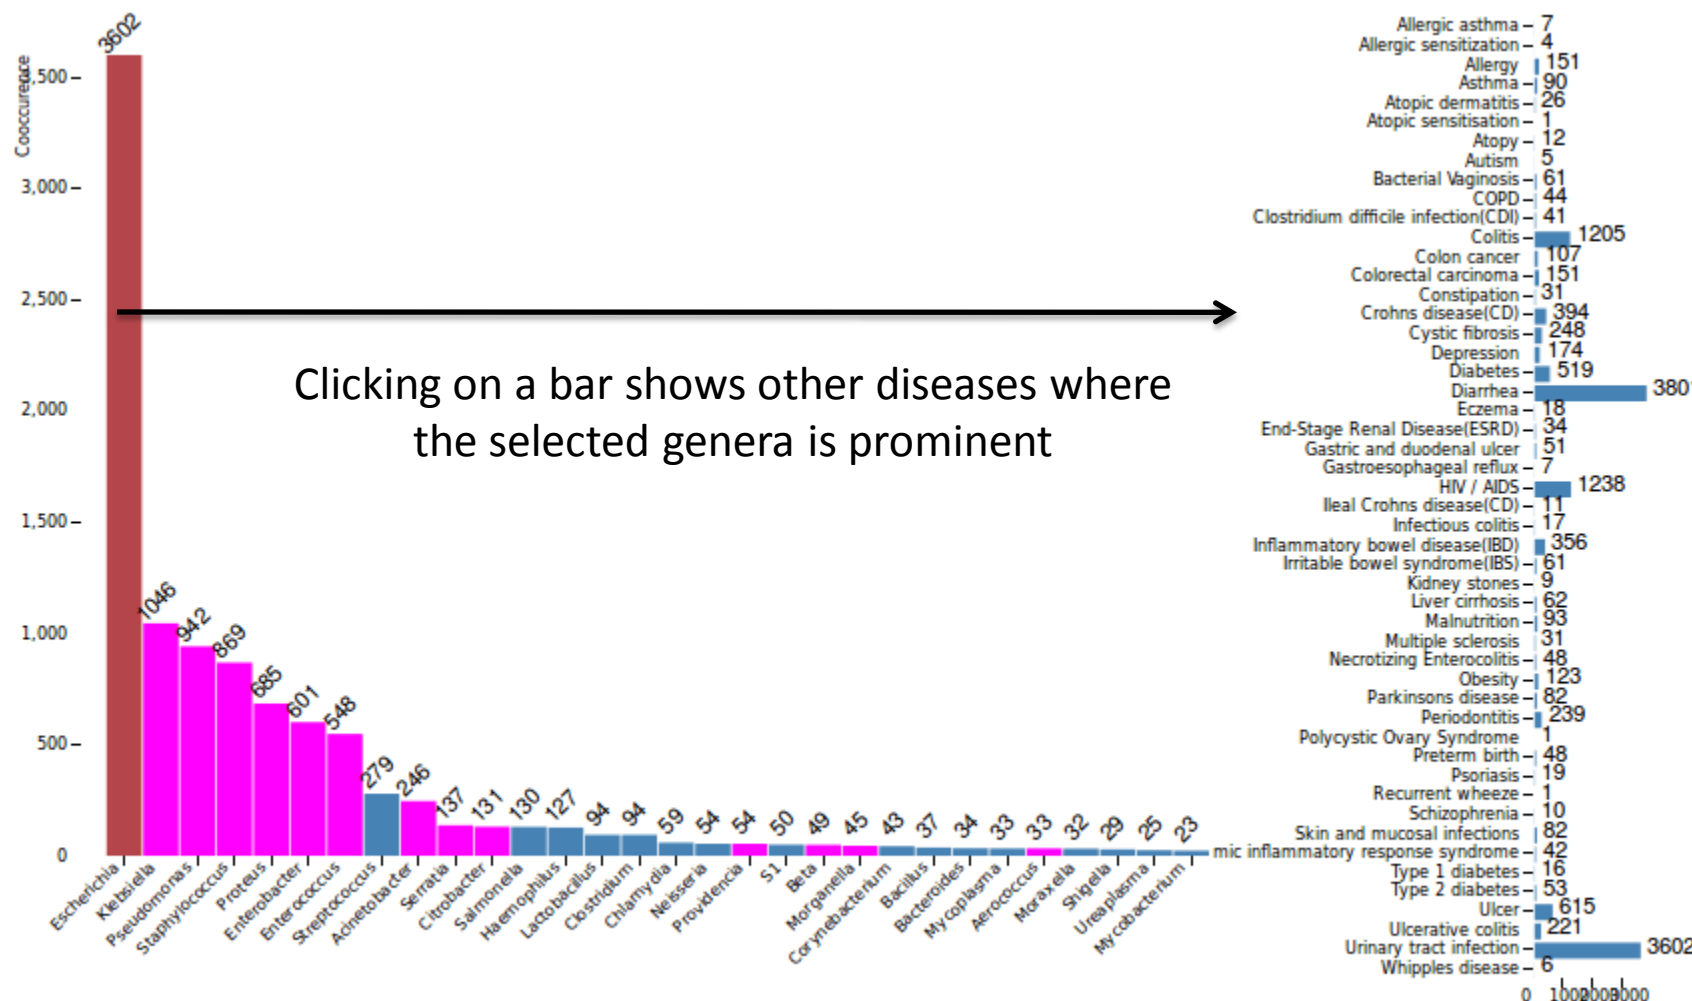

N.B: Pink bars represent the taxa identified to be associated significantly with the disease

**Supplementary Figure 24** :Visualizing top genera associated with disease UTI





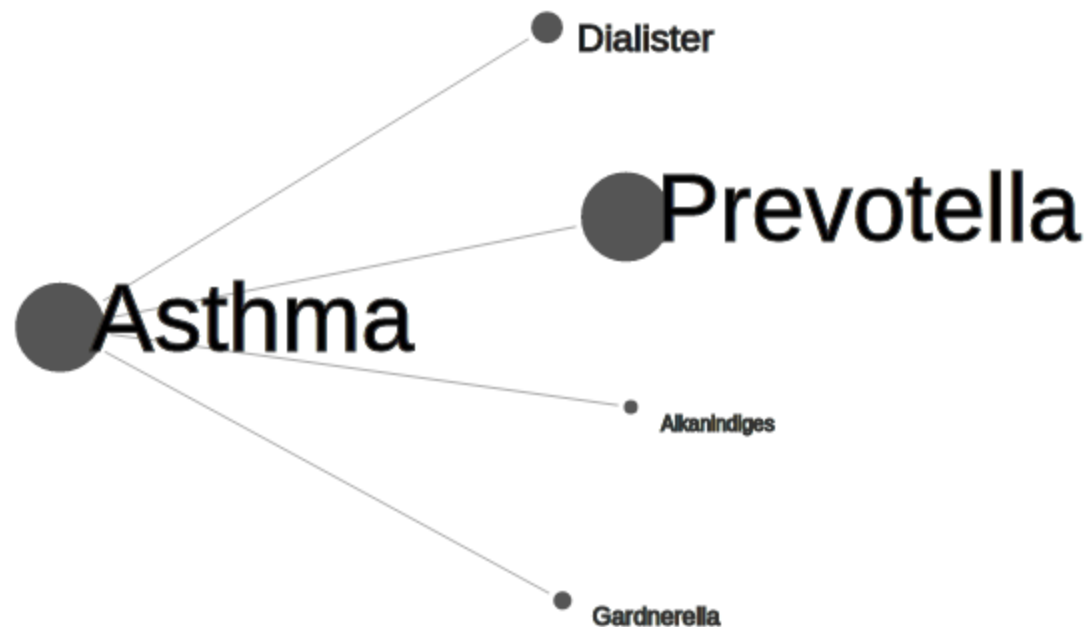

| Evidence Statistics      |                     |                                                   |                     |                              |
|--------------------------|---------------------|---------------------------------------------------|---------------------|------------------------------|
| Cooccurrence Statistics: |                     | P Values                                          |                     |                              |
| Genus/Disease            | Number of Abstracts | Statistical Test for Significance of Cooccurrence | Uncorrected P value | Bonferroni Corrected P value |
| Asthma AND Prevotella    | 18                  | One Sided Fisher Exact Test                       | <0.001              | <0.001                       |
| ONLY Prevotella          | 3859                | Two Sided Fisher Exact Test                       | <0.001              | <0.001                       |
| ONLY Asthma              | 1096                | Chi Square Test                                   | <0.0001             | <0.0001                      |
| NONE                     | 632455              |                                                   |                     |                              |

**Supplementary Figure 26 :**Evidence of selected Asthma associated genera. The node and label size are mapped to the number of evidences found for the association.

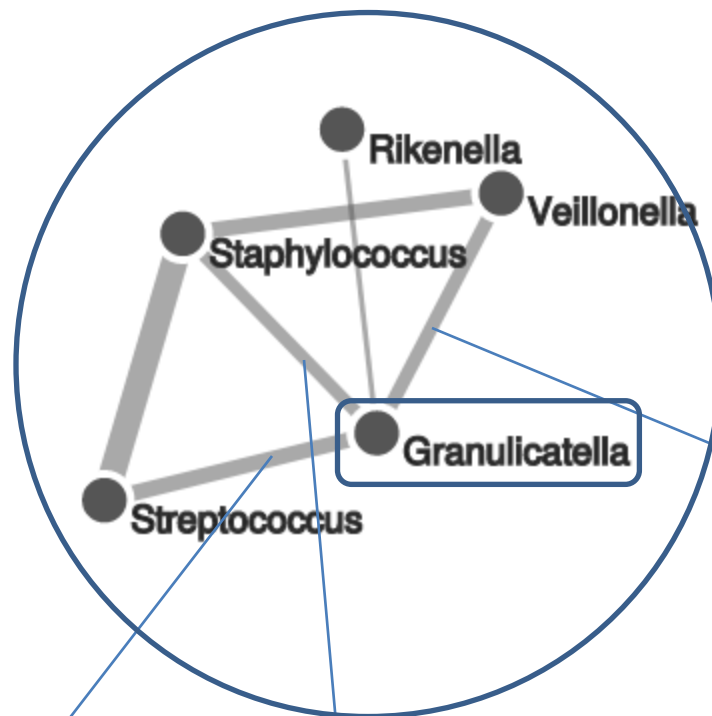

| Genus                          | In Allergic asthma | In All Diseases | In All Abstracts |
|--------------------------------|--------------------|-----------------|------------------|
| <a href="#">Granulicatella</a> | 0                  | 35              | 165              |
| <a href="#">Streptococcus</a>  | 6                  | 3170            | 41688            |
| Both                           | 0                  | 18              | 80               |

| Genus                          | In Allergic asthma | In All Diseases | In All Abstracts |
|--------------------------------|--------------------|-----------------|------------------|
| <a href="#">Granulicatella</a> | 0                  | 35              | 165              |
| <a href="#">Staphylococcus</a> | 6                  | 5801            | 70266            |
| Both                           | 0                  | 8               | 23               |

| Genus                          | In Allergic asthma | In All Diseases | In All Abstracts |
|--------------------------------|--------------------|-----------------|------------------|
| <a href="#">Granulicatella</a> | 0                  | 35              | 165              |
| <a href="#">Veillonella</a>    | 0                  | 228             | 915              |
| Both                           | 0                  | 14              | 35               |

**Supplementary Figure 27** : Evidence indices for *Granulicatella*

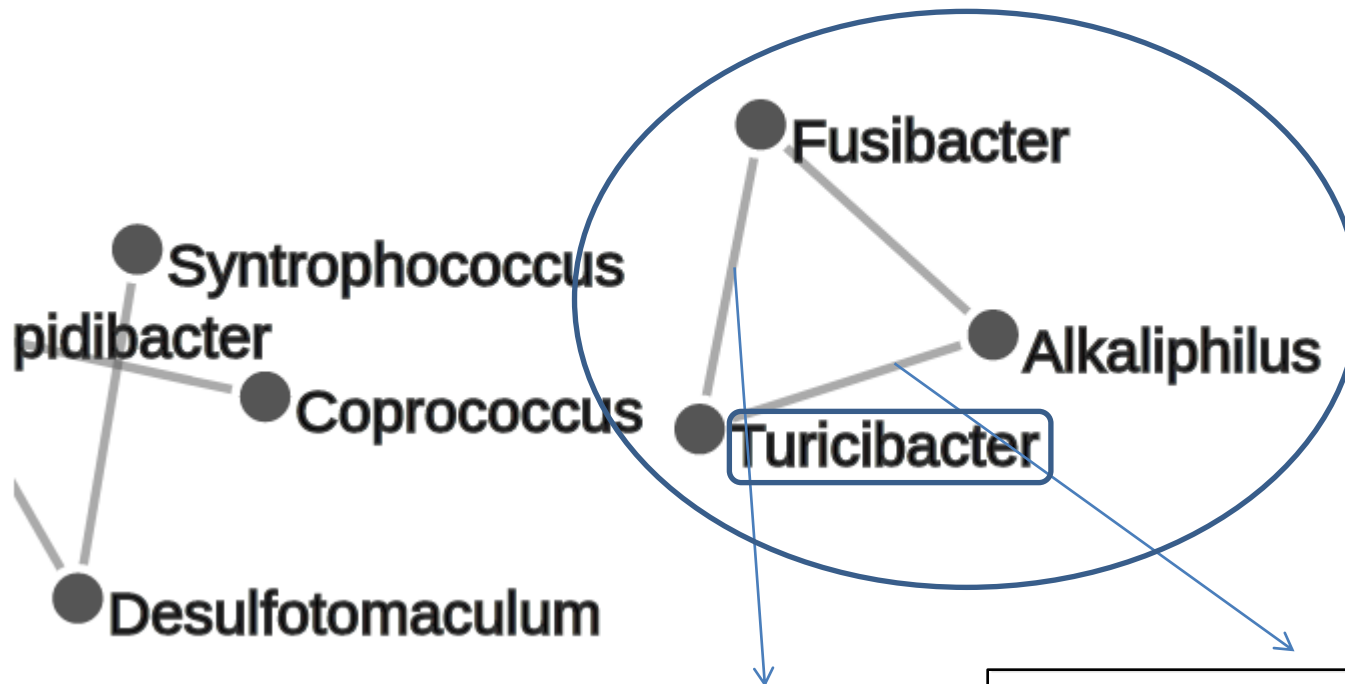

| Genus                        | In Allergic asthma | In All Diseases | In All Abstracts |
|------------------------------|--------------------|-----------------|------------------|
| <a href="#">Fusibacter</a>   | 0                  | 1               | 16               |
| <a href="#">Turicibacter</a> | 0                  | 28              | 83               |
| Both                         | 0                  | 0               | 0                |

| Genus                        | In Allergic asthma | In All Diseases | In All Abstracts |
|------------------------------|--------------------|-----------------|------------------|
| <a href="#">Alkaliphilus</a> | 0                  | 0               | 56               |
| <a href="#">Turicibacter</a> | 0                  | 28              | 83               |
| Both                         | 0                  | 0               | 0                |

**Supplementary Figure 28** :Evidence indices for *Turicibacter*
